# Consequences of natural perturbations in the human plasma proteome

Benjamin B. Sun<sup>1\*</sup>, Joseph C. Maranville<sup>2\*</sup>, James E. Peters<sup>1,3\*</sup>, David Stacey<sup>1</sup>, James R. Staley<sup>1</sup>, James Blackshaw<sup>1</sup>, Stephen Burgess<sup>1,4</sup>, Tao Jiang<sup>1</sup>, Ellie Paige<sup>1</sup>, Praveen Surendran<sup>1</sup>, Clare Oliver-Williams<sup>1</sup>, Mihir A. Kamat<sup>1</sup>, Bram P. Prins<sup>1</sup>, Sheri K. Wilcox<sup>5</sup>, Erik S. Zimmerman<sup>5</sup>, An Chi<sup>2</sup>, Narinder Bansal<sup>1,6</sup>, Sarah L. Spain<sup>7</sup>, Angela M. Wood<sup>1</sup>, Nicholas W. Morrell<sup>8</sup>, John R. Bradley<sup>9</sup>, Nebojsa Janjic<sup>5</sup>, David J. Roberts<sup>10,11</sup>, Willem H. Ouwehand<sup>3,12,13,14,15</sup>, John A. Todd<sup>16</sup>, Nicole Soranzo<sup>3,12,14,15</sup>, Karsten Suhre<sup>17</sup>, Dirk S. Paul<sup>1</sup>, Caroline S. Fox<sup>2</sup>, Robert M. Plenge<sup>2</sup>, John Danesh<sup>1,3,14,15</sup>, Heiko Runz<sup>2\*</sup>, Adam S. Butterworth<sup>1,15\*</sup>

1. MRC/BHF Cardiovascular Epidemiology Unit, Department of Public Health and Primary Care, University of Cambridge, Cambridge CB1 8RN, UK.
2. MRL, Merck & Co., Inc., Kenilworth, New Jersey, USA.
3. British Heart Foundation Cambridge Centre of Excellence, Division of Cardiovascular Medicine, Addenbrooke's Hospital, Cambridge CB2 0QQ, UK.
4. MRC Biostatistics Unit, University of Cambridge, Cambridge CB2 0SR, UK.
5. SomaLogic Inc., Boulder, Colorado 80301, USA.
6. Perinatal Institute, Birmingham B15 3BU, UK.
7. Wellcome Trust Sanger Institute, Wellcome Trust Genome Campus, Hinxton, Cambridge CB10 1RQ, UK.
8. Division of Respiratory Medicine, Department of Medicine, University of Cambridge, Cambridge CB2 0QQ, UK.
9. NIHR Cambridge Biomedical Research Centre / BioResource, Cambridge University Hospitals, Cambridge CB2 0QQ, UK.
10. National Health Service (NHS) Blood and Transplant and Radcliffe Department of Medicine, NIHR Oxford Biomedical Research Centre, University of Oxford, John Radcliffe Hospital, Oxford OX3 9DU, UK.
11. BRC Haematology Theme and Department of Haematology, Churchill Hospital, Oxford OX3 7LE, UK.
12. Department of Haematology, University of Cambridge, Cambridge Biomedical Campus, Long Road, Cambridge CB2 0PT, UK.
13. National Health Service (NHS) Blood and Transplant, Cambridge Biomedical Campus, Cambridge CB2 0PT, UK.
14. Department of Human Genetics, Wellcome Trust Sanger Institute, Wellcome Trust Genome Campus, Hinxton, Cambridge CB10 1RQ, UK.
15. NIHR Blood and Transplant Research Unit in Donor Health and Genomics, Department of Public Health and Primary Care, University of Cambridge, Cambridge CB1 8RN, UK.
16. JDRF/Wellcome Trust Diabetes and Inflammation Laboratory, Wellcome Trust Centre for Human Genetics, Nuffield Department of Medicine, NIHR Oxford Biomedical Research Centre, University of Oxford, Oxford OX3 7BN, UK.
17. Department of Physiology and Biophysics, Weill Cornell Medicine - Qatar, PO 24144 Doha, Qatar.

\* These authors contributed equally to this work.

Corresponding authors: [asb38@medschl.cam.ac.uk](mailto:asb38@medschl.cam.ac.uk) (A.S.B.), [jd292@medschl.cam.ac.uk](mailto:jd292@medschl.cam.ac.uk) (J.D.)

## 48 **Abstract**

49 Proteins are the primary functional units of biology and the direct targets of most drugs, yet  
50 there is limited knowledge of the genetic factors determining inter-individual variation in  
51 protein levels. Here we reveal the genetic architecture of the human plasma proteome, testing  
52 10.6 million DNA variants against levels of 2,994 proteins in 3,301 individuals. We identify  
53 1,927 genetic associations with 1,478 proteins, a 4-fold increase on existing knowledge,  
54 including *trans* associations for 1,104 proteins. To understand consequences of perturbations  
55 in plasma protein levels, we introduce an approach that links naturally occurring genetic  
56 variation with biological, disease, and drug databases. We provide insights into pathogenesis  
57 by uncovering the molecular effects of disease-associated variants. We identify causal roles  
58 for protein biomarkers in disease through Mendelian randomization analysis. Our results  
59 reveal new drug targets, opportunities for matching existing drugs with new disease  
60 indications, and potential safety concerns for drugs under development.

## 61 **Introduction**

62 Plasma proteins play key roles in biological processes such as signalling, transport, growth,  
63 repair, and defence against infection. They are frequently dysregulated in disease and are the  
64 targets of many drugs. Detailed characterisation of the genetic factors that determine inter-  
65 individual protein variability will, therefore, furnish both fundamental and applied insights<sup>1</sup>.  
66 Despite evidence of the heritability of plasma protein abundance<sup>2</sup>, systematic genome-wide  
67 study of such ‘protein quantitative trait loci’ (pQTLs) has been constrained by inability to  
68 measure large numbers of proteins reliably in large numbers of individuals<sup>1,3-5</sup>.

69

70 Here we combine several technical and conceptual advances to create and interrogate a rich  
71 genetic atlas of the human plasma proteome. First, we use a markedly expanded version of an  
72 aptamer-based multiplex protein assay (SOMAscan)<sup>6</sup> to quantify 3,620 plasma proteins in  
73 3,301 healthy individuals, representing several-fold increases both in breadth of protein panel  
74 and in cohort size. Second, we exploit improvements in genotype imputation panels to  
75 achieve 10-fold denser genotypic coverage than in previous proteomic studies<sup>7</sup>. Third, we  
76 draw on studies with multi-dimensional data (e.g., transcriptomics and clinical phenotypes)  
77 and on new bioinformatics tools to help understand mechanisms and clinical consequences of  
78 perturbations in protein pathways<sup>8</sup>. Fourth, we use two-sample “Mendelian randomization”  
79 techniques to evaluate the causal relevance of protein biomarkers to disease<sup>9</sup>. Finally, we  
80 cross-reference genomic-proteomic information with disease and drug databases to identify  
81 and prioritise therapeutic targets.

82

83 Our study characterises the genetic architecture of the human plasma proteome, identifying  
84 1,927 genotype-protein associations, including *trans*-associated loci for 1,104 proteins that  
85 provide key insights into protein regulation. More than 150 pQTLs overlap with disease

86 susceptibility loci, elucidating the molecular effects of disease-associated variants. We find  
87 strong evidence to support causal roles in disease for several protein pathways, highlighting  
88 novel therapeutic targets as well as potential safety concerns for drugs in development.

89

## 90 **Genetic architecture of the plasma proteome**

91 After stringent quality control, we performed genome-wide testing of 10.6 million autosomal  
92 variants against levels of 2,994 plasma proteins in 3,301 healthy European-ancestry  
93 individuals (Methods, Extended Data Figure 1). Genotypes were measured using the  
94 Affymetrix Axiom UK Biobank array and imputed against a combined 1000 Genomes and  
95 UK10K reference panel. Protein levels were measured using the SOMAscan assay. We  
96 evaluated the robustness of protein measurements in several ways (Methods, Supplementary  
97 Note). Measurements in replicate samples were highly consistent; the median coefficient of  
98 variation across all proteins was 0.064 (interquartile range 0.049-0.092). We also showed  
99 temporal consistency in protein levels in samples obtained two years apart from the same  
100 individuals, reproduced known associations with non-genetic factors, and verified selected  
101 protein measurements with multiple different assay methods.

102

103 We found 1,927 genome-wide significant ( $p < 1.5 \times 10^{-11}$ ) associations between 1,478 proteins  
104 and 764 genomic regions (Figure 1a, Supplementary Table 1, Supplementary Video 1), with  
105 89% of pQTLs reported here for the first time. Of these 764 regions, 502 (66%) had *cis*  
106 associations only, 228 (30%) had *trans* associations only and 34 (4%) had both *cis* and *trans*.  
107 95% and 87% of our *cis* pQTL variants were located within 200Kb and 100Kb, respectively,  
108 of the relevant gene's transcription start site (TSS) (Figure 1b), and 44% were within the  
109 gene itself. The *p*-values for *cis* pQTL associations increased with increasing distance from  
110 the TSS, mirroring findings for *cis* expression QTLs (eQTLs) in transcriptomic studies<sup>10,11</sup>.

111 Of the proteins for which we identified a pQTL, 88% had either *cis* (n=374) or *trans* (n=925)  
112 associations only, while 12% (n=179) had both. The majority of significantly associated  
113 proteins (75%; n=1,113) had a single pQTL, while 20% had two and 5% had more than two  
114 (Figure 1c). To detect multiple signals at the same locus we used stepwise conditional  
115 analysis, identifying 2,658 conditionally significant associations (Supplementary Table 2). Of  
116 the 1,927 locus-protein associations, 414 (21%) had multiple conditionally significant signals  
117 (Figure 1d), of which 255 were *cis*.

118

119 Genetic variants that change the protein structure may result in apparent pQTLs due to  
120 altered aptamer binding rather than true quantitative differences in protein levels. Using  
121 bioinformatic approaches to evaluate the extent to which *cis* pQTLs might reflect technical  
122 effects (Methods) we found that 91% of pQTLs were unlikely to be influenced by differential  
123 aptamer binding (Supplementary Tables 1 and 3). Furthermore, in sub-studies that involved  
124 immunoassays, we found strongly concordant genotype-protein associations (Supplementary  
125 Note). Even where apparent pQTLs do arise from alternative protein structure that may affect  
126 aptamer binding rather than differences in protein abundance, such signals may be  
127 functionally significant.

128

129 The median variation in protein levels explained by our pQTLs was 5.8% (in-sample  
130 estimate; interquartile range: 2.6%-12.4%, Figure 1e). For 193 proteins, however, genetic  
131 variants explained more than 20% of the variation, such as for teratocarcinoma-derived  
132 growth factor 1 (65%) and haptoglobin (55%). We found a strong inverse relationship  
133 between effect size and minor allele frequency (MAF) (Figure 1f), consistent with previous  
134 genome-wide association studies (GWAS) of quantitative traits<sup>12-14</sup>. We found 25  
135 associations with rare (MAF <1%) variants and a further 207 associations with low-

136 frequency (MAF 1-5%) variants. Of the 31 strongest pQTLs (per-allele effect size >1.5  
137 standard deviations), 25 were rare or low-frequency variants.

138

139 pQTLs were strongly enriched for missense variants ( $p<0.0001$ ) and for location in 3'  
140 untranslated ( $p=0.0025$ ) or splice regions ( $p=0.0004$ ) ([Figure 1g](#), [Extended Data Figure 2](#)).

141 To assess whether pQTLs were enriched within regulatory elements from a wide range of cell  
142 types and tissues<sup>15-17</sup>, we used GARFIELD<sup>18</sup> ([Methods](#)). We found strong ( $\geq 3$ -fold,  
143  $p<5\times 10^{-5}$ ) enrichment of pQTLs in blood cells – unsurprisingly given our use of plasma - at  
144 features indicative of transcriptional activation ([Extended Data Figure 3](#), [Supplementary](#)  
145 [Table 4](#)). We also found enrichment at hepatocyte regulatory elements, consistent with the  
146 liver's role in producing many secreted proteins.

147

## 148 **Overlap of loci for gene expression and protein levels**

149 A fundamental biological question is the extent to which genetic associations with plasma  
150 protein levels are driven by effects at the transcription level, rather than other mechanisms,  
151 such as altered protein clearance or cleavage of membrane receptor proteins from the cell  
152 surface. We therefore cross-referenced our *cis* pQTLs with a wide range of publicly available  
153 eQTL studies involving >30 tissues or cell types ([Supplementary Table 5](#)) using  
154 PhenoScanner<sup>8</sup>. 40% (n=224) of *cis* pQTLs had an association with expression of the same  
155 gene in at least one tissue ([Supplementary Table 6](#)), consistent with similar comparisons  
156 within lymphoblastoid cell lines (LCLs)<sup>19</sup>. The greatest overlaps were found in whole blood  
157 (n=117), liver (n=70) and LCLs (n=52), consistent with biological expectation, but also likely  
158 driven by the larger sample sizes for expression studies of these cell types. *Cis* pQTLs were  
159 significantly enriched ( $p<0.0001$ ) for eQTLs for the corresponding gene (mean 20% versus  
160 2% in a background permuted set; [Methods](#), [Supplementary Table 7](#)). To address the

161 converse (i.e., to what extent do eQTLs translate into pQTLs), we used a subset of well-  
162 powered eQTL studies in relevant tissues (whole blood, LCLs, liver and monocytes<sup>20-23</sup>). Of  
163 the strongest *cis* eQTLs ( $p < 1.5 \times 10^{-11}$ ), 12.2% of those in whole blood were also *cis* pQTLs,  
164 21.3% for LCLs, 14.8% for liver and 14.7% for monocytes.

165

166 Comparisons between eQTL and pQTL studies have inherent limitations due to differences in  
167 the tissues, sample sizes and technological platforms used. Moreover, plasma protein levels  
168 may not reflect levels within tissues or cells. Nevertheless, our data suggest that plasma  
169 protein abundance is often, but not exclusively, driven by regulation of mRNA. Our finding  
170 that pQTLs are enriched in gene regulatory regions supports the notion that transcription has  
171 a major role. *Cis* pQTLs without corresponding *cis* eQTLs may be underpinned by effects not  
172 captured at the mRNA level, such as differences in protein stability, degradation, binding,  
173 secretion, or clearance from circulation.

174

## 175 **Using *trans* pQTLs to illuminate biological pathways**

176 *Trans* pQTLs are particularly useful for understanding biological relationships between  
177 proteins if a causal gene at the *trans*-associated genetic locus can be identified. To this end,  
178 we used a combination of databases of molecular pathways and protein-protein interaction  
179 networks, and functional genomic data that include variant annotation, eQTL and  
180 chromosome conformation capture, to link *trans*-associated variants to potential causal genes  
181 (Methods, Supplementary Table 8, Extended Data Figure 4). Of the 764 protein-associated  
182 regions, 262 had *trans* associations with 1,104 proteins. We replicated previously reported  
183 *trans* associations including *TMPRSS6* with transferrin receptor protein 1<sup>24</sup> and *SORT1* with  
184 granulins<sup>25</sup>. Most (82%) *trans* loci were associated with fewer than four proteins. However,  
185 we observed twelve regions with more than 20 associated proteins (Figure 1a, Extended Data

186 Figure 5), including well-known pleiotropic loci (e.g., *ABO*, *CFH*, *APOE*, *KLKB1*) and loci  
187 associated with many correlated proteins (e.g., the locus containing the transcription factor  
188 gene, *ZFPM2*).

189

190 We identified a number of novel associations with strong biological plausibility  
191 (Supplementary Table 9, Supplementary Note). Growth differentiation factor 8 (GDF8, more  
192 commonly known as myostatin) provides one such example. Because insufficient myostatin  
193 has been shown to result in excessive muscle growth<sup>26</sup>, myostatin inhibition has emerged as a  
194 promising therapeutic strategy for treatment of conditions characterised by muscle weakness,  
195 such as muscular dystrophy<sup>27</sup>. We identified a common allele (rs11079936:C) near  
196 *WFIKKN2* that is associated in *trans* with lower levels of plasma GDF11/8 ( $p=7.9 \times 10^{-12}$ ), as  
197 well as in *cis* with lower levels of plasma WFIKKN2 ( $p=6.9 \times 10^{-136}$ , Supplementary Table 1,  
198 Figure 2). The *trans* association attenuated completely upon adjustment for levels of  
199 WFIKKN2 ( $p=0.7$ ), while the *cis* association remained significant after adjustment for  
200 GDF11/8 ( $p=7.2 \times 10^{-113}$ ), suggesting that WFIKKN2 regulates GDF11/8. This observation is  
201 supported by *in vitro* evidence suggesting that WFIKKN2 has high affinity for GDF8 and  
202 GDF11<sup>28</sup>. This finding illustrates how delineation of causal genes at *trans*-associated loci  
203 may help identify additional drug targets in pathways known to be relevant to disease.

204

## 205 **Identifying causal pathways underlying disease susceptibility loci**

206 GWAS have identified thousands of loci associated with common diseases, but the pathways  
207 by which most variants influence disease susceptibility await discovery. To identify  
208 intermediate links between genotype and disease, we overlapped pQTLs with disease-  
209 associated genetic variants identified through GWAS ( $p < 5 \times 10^{-8}$ ). 152 of our pQTLs were  
210 strongly correlated ( $r^2 \geq 0.8$ ) with variants significantly associated with disease



211 (Supplementary Table 10), including 38 with *cis* associations, 109 with *trans* associations  
212 and 5 with both. In the examples below, we illustrate how our findings provide novel insights  
213 spanning a wide range of disease domains including autoimmunity, cancer and  
214 cardiovascular disease.

215

216 Our *trans* pQTL data implicate previously unsuspected proteins as mediators through which  
217 genetic loci exert their influence on disease risk. For example, GWAS have identified a  
218 missense allele (rs3197999:A, p.Arg703Cys) in *MST1* on chromosome 3 that increases risk  
219 of inflammatory bowel disease (IBD) (Figure 3)<sup>29,30</sup>, and decreases plasma MST1 levels<sup>31</sup>.  
220 We show that this polymorphism acts in *trans* to reduce abundance of BLIMP1, encoded by  
221 *PRDMI* on chromosome 6 (Figure 3, Supplementary Table 1). BLIMP1 is a transcriptional  
222 master regulator that plays a critical role in the terminal differentiation of immune cells.  
223 Intriguingly, there is another IBD association signal in the intergenic region adjacent to  
224 *PRDMI* on chromosome 6 (Figure 3)<sup>30</sup>. Both *PRDMI* and its neighbour *ATG5*, which  
225 encodes a protein involved in autophagy, are plausible candidate genes at this locus. Our data  
226 implicate BLIMP1 as a previously unidentified mediator of the IBD association in *MST1* on  
227 chromosome 3. In addition, our results provide indirect support for the hypothesis that  
228 *PRDMI* is the causal gene underlying the chromosome 6 association.

229

230 We next show how pQTL data can elucidate pathogenic mechanisms. Anti-neutrophil  
231 cytoplasmic antibody-associated vasculitis (AAV) is an autoimmune disease characterised by  
232 autoantibodies to the neutrophil proteases proteinase-3 (PR3) or myeloperoxidase (MPO).  
233 Clinico-pathological features mirror antibody specificity, with granulomatous inflammation  
234 typically correlating with anti-PR3 antibodies (PR3+ AAV). GWAS have identified signals  
235 in *PRTN3* (encoding PR3) and *SERPINA1* (encoding alpha1-antitrypsin, an inhibitor of PR3)

236 specific to PR3+ AAV<sup>32</sup>. We identified a *cis* pQTL immediately upstream of *PRTN3*  
237 (Supplementary Table 1). By linking the risk allele at *PRTN3* to higher plasma levels of the  
238 autoantigen PR3, our data strongly suggest a pathogenic role of anti-PR3 antibodies in this  
239 disease.

240

241 The vasculitis risk allele at the *SERPINA1* locus (rs28929474:T, also known as the ‘Z’ allele)  
242 is a missense variant (p.Glu366Lys) which results in defective secretion of alpha1-  
243 antitrypsin. We found that the Z allele was not only associated with lower plasma alpha1-  
244 antitrypsin, but was also a pQTL “hotspot” associated with 13 proteins using our  
245 conservative significance threshold ( $p < 1.5 \times 10^{-11}$ ) (Figure 4) and 19 at  $p < 5 \times 10^{-8}$ . This finding  
246 illustrates how a single mutation can lead to widespread perturbation of downstream proteins.  
247 One of these proteins was NCF2 (neutrophil cytosolic factor 2), which plays a key role in the  
248 neutrophil oxidative burst. Mutations in *NCF2* can result in a rare condition known as chronic  
249 granulomatous disease, which like PR3+ AAV exhibits granulomatous inflammation. Our  
250 results suggest NCF2 may mediate this characteristic feature of PR3+ AAV.

251

## 252 **Causal evaluation of candidate proteins in disease**

253 Association of plasma protein levels with disease does not necessarily imply causation. To  
254 help establish causality, we employed the principle of Mendelian randomization (MR)<sup>33</sup>. In  
255 contrast with observational studies, which are liable to confounding and/or reverse causation,  
256 MR analysis is akin to a “natural” randomised controlled trial, exploiting the random  
257 allocation of alleles at conception (Extended Data Figure 6). Consequently, if a genetic  
258 variant that specifically influences levels of a protein is also associated with disease risk, then  
259 it provides strong evidence of the protein’s causal role. For example, serum levels of PSP-94  
260 (MSMB), a hormone synthesized by the prostate gland and secreted into seminal fluid, are

261 lower in patients with prostate cancer; PSP-94 is therefore a candidate biomarker for prostate  
262 cancer<sup>34</sup>. However, it is debated whether PSP-94 plays a causal role in tumorigenesis. We  
263 identified a *cis* pQTL for PSP-94 at a prostate cancer susceptibility locus<sup>35</sup> and showed that  
264 the risk allele is associated with lower PSP-94 plasma levels, supporting a protective role for  
265 the protein.

266

267 In an approach that extends classic MR analysis, we leveraged multi-variant MR analysis  
268 methods to distinguish causal genes among multiple plausible candidates at disease loci  
269 (Methods), exemplified by the *IL1RL1-IL18R1* locus. We identify four proteins that each had  
270 *cis* pQTLs at this locus (Supplementary Table 1), which has been associated with a range of  
271 immune-mediated diseases including atopic dermatitis<sup>36</sup>. We created a genetic score for each  
272 protein using multiple protein-increasing alleles. Initial “one-protein-at-a-time” analysis  
273 identified associations of the scores for IL18R1 ( $p=9.3\times 10^{-72}$ ) and IL1RL1 ( $p=5.7\times 10^{-27}$ )  
274 with atopic dermatitis risk (Figure 5a). In addition, we found a weak association for IL1RL2  
275 ( $p=0.013$ ). We then mutually adjusted these associations for one another to account for the  
276 effects of the variants on multiple proteins. While the association of IL18R1 remained  
277 significant ( $p=1.5\times 10^{-28}$ ), the association of IL1RL1 ( $p=0.01$ ) was attenuated. In contrast, the  
278 association of IL1RL2 ( $p=1.1\times 10^{-69}$ ) became much stronger, suggesting that IL1RL2 and  
279 IL18R1 are the causal proteins influencing risk of atopic dermatitis at this locus.

280

281 We also used multiple *cis*-associated variants to evaluate whether macrophage  
282 metalloelastase (MMP-12) plays a causal role in coronary disease. Since MMP-12 is known  
283 to play a role in lung damage, MMP-12 inhibitors are being tested in chronic obstructive  
284 pulmonary disease (COPD). Observational studies report associations of higher levels of  
285 plasma MMP-12 with recurrent cardiovascular events<sup>37,38</sup>. In contrast, our multi-allelic

286 genetic score, which explains 14% of the variation in plasma MMP-12 levels (Methods),  
287 indicates that genetic predisposition to higher MMP-12 levels is associated with *decreased*  
288 coronary disease risk ( $p=2.8 \times 10^{-13}$ ) (Figure 5b) and *decreased* large artery atherosclerotic  
289 stroke risk<sup>39</sup>. As MMP-12 is released from macrophages in response to cardiovascular  
290 injury<sup>40</sup>, it is possible that higher MMP-12 levels are cardioprotective. Hence, our results  
291 identify a potential cardiovascular safety concern for MMP-12 inhibitors, particularly as  
292 patients with COPD are at high baseline cardiovascular risk due to smoking history.

293

## 294 **Drug target prioritisation**

295 Because therapeutic targets implicated by human genetic data are likely to play causal roles  
296 in disease, drugs directed at such targets have greater likelihood of success<sup>41</sup>. According to  
297 the Informa Pharmaprojects database (Citeline), 244 of the proteins linked to a disease-  
298 associated variant by our pQTL data are drug targets (Supplementary Table 11). Of the  
299 proteins we identified as associated with disease susceptibility loci, 49 are targets of already  
300 approved drugs such as tocilizumab and ustekinumab (Supplementary Table 12).

301

302 To identify additional indications for existing drugs, we investigated disease associations of  
303 pQTLs for proteins already targeted by licensed drugs. Our results suggest potential drug “re-  
304 purposing” opportunities (Supplementary Table 12). For example, we identified a *cis* pQTL  
305 for RANK (encoded by *TNFRSF11A*) at a locus associated with Paget’s disease<sup>42</sup>, a condition  
306 characterised by excessive bone turnover leading to deformity and fracture. Standard  
307 treatment consists of osteoclast inhibition with bisphosphonates, originally developed as anti-  
308 osteoporotic drugs. Denosumab, another anti-osteoporosis drug, is a monoclonal antibody  
309 targeting RANKL, the ligand for RANK. Our data suggest denosumab may be a useful

310 alternative for patients with Paget's disease in whom bisphosphonates are contra-indicated, a  
311 hypothesis supported by clinical case reports<sup>43,44</sup>.

312

313 To evaluate targets for drugs currently under development, we considered the example of  
314 glycoprotein Ib platelet alpha subunit (GP1BA), the receptor for von Willebrand factor.  
315 Drugs directed at GP1BA are in pre-clinical development as anti-thrombotic agents and in  
316 phase 2 trials to treat thrombotic thrombocytopenic purpura, a life-threatening disorder. We  
317 identify a *trans* pQTL for GP1BA at the pleiotropic *SH2B3/BRAP* locus, which is associated  
318 with platelet count<sup>45</sup>, myocardial infarction and stroke. The risk allele for cardiovascular  
319 disease increases both plasma GP1BA and platelet count, suggesting a mechanism by which  
320 this locus affects disease susceptibility. As a confirmation of the link between GP1BA and  
321 the platelet count, we found a directionally concordant *cis* pQTL for GP1BA at a platelet  
322 count-associated variant (Supplementary Table 12). Collectively, these results suggest that  
323 targeting GP1BA may be efficacious in conditions characterised by platelet aggregation such  
324 as arterial thrombosis. More generally, our data provide a foundation for generating  
325 hypotheses about targets for new drug development through the approach of linking genetic  
326 factors to disease via specific proteins (Supplementary Table 12).

327

## 328 **Discussion**

329 We conducted protein measurements of unprecedented scope and scale to reveal genetic  
330 control of the human plasma proteome. Our discoveries enabled identification of important  
331 consequences of natural perturbations in the plasma proteome. First, we identified the  
332 downstream effects of alterations in specific protein levels, revealing novel regulators of  
333 protein pathways. Second, we used plasma proteins to uncover intermediate molecular  
334 pathways that connect the genome to disease endpoints. Previous investigation has focused

335 on genes in the vicinity of disease susceptibility loci. By contrast, we made key advances  
336 through use of *trans* pQTLs to implicate previously unsuspected proteins encoded by distant  
337 genes. Third, we established causal roles for protein biomarkers in vascular, neoplastic, and  
338 autoimmune diseases using the principle of Mendelian randomization (MR). Proteins provide  
339 an ideal paradigm for MR analysis because they are under proximal genetic control. Whereas  
340 MR studies of plasma proteins have been constrained by availability of few suitable genetic  
341 instruments, our data remedy this bottleneck by furnishing an extensive toolkit. Fourth, we  
342 introduced an approach that should help reduce the unsustainably high attrition rates of drugs  
343 in pharmaceutical pipelines. Overall, our study foreshadows major advances in post-genomic  
344 science through increasing application of novel bioassay technologies to major population  
345 biobanks.

## 346 **Methods**

### 347 **Study participants**

348 The INTERVAL study comprises approximately 50,000 participants nested within a  
349 randomised trial of blood donation intervals<sup>46</sup>. Between mid-2012 and mid-2014, whole-  
350 blood donors aged 18 years and older were consented and recruited at 25 centers of  
351 England's National Health Service Blood and Transplant. All participants completed an  
352 online questionnaire including questions about demographic characteristics (e.g., age, sex,  
353 ethnic group), anthropometry (height, weight), lifestyle (e.g., alcohol and tobacco  
354 consumption) and diet. Participants were generally in good health because blood donation  
355 criteria exclude people with a history of major disease (such as myocardial infarction, stroke,  
356 cancer, HIV, and hepatitis B or C) and those who have had recent illness or infection. For  
357 protein assays, we randomly selected two non-overlapping subcohorts of 2,731 and 831  
358 participants from INTERVAL. Participant characteristics are shown in Supplementary Table  
359 13.

360

### 361 **Plasma sample preparation**

362 Sample collection procedures for INTERVAL have been described previously<sup>46</sup>. In brief,  
363 blood samples for research purposes were collected in 6ml EDTA tubes using standard  
364 venepuncture protocols. The tubes were inverted three times and transferred at room  
365 temperature to UK Biocentre (Stockport, UK) for processing. Plasma was extracted into two  
366 0.8ml plasma aliquots by centrifugation and subsequently stored at -80°C prior to use.

367

### 368 **Protein measurements**

369 We used a multiplexed, aptamer-based approach (SOMAscan assay) to measure the relative  
370 concentrations of 3,620 plasma proteins/protein complexes assayed using 4,034 aptamers  
371 (“SOMAmer reagents”, hereafter referred to as “SOMAmers”). The assay extends the lower  
372 limit of detectable protein abundance afforded by conventional approaches (e.g.,  
373 immunoassays), measuring both extracellular and intracellular proteins (including soluble  
374 domains of membrane-associated proteins), with a bias towards proteins likely to be found in  
375 the human secretome (Extended Data Figure 7a)<sup>6,47</sup>. The proteins cover a wide range of  
376 molecular functions (Extended Data Figure 7b). The selection of proteins on the platform  
377 reflects both the availability of purified protein targets and a focus on proteins known to be  
378 involved in pathophysiology of human disease.

379

380 Aliquots of 150µl of plasma were sent on dry ice to SomaLogic Inc. (Boulder, Colorado, US)  
381 for protein measurement. Assay details have been previously described<sup>47-49</sup> and a technical  
382 white paper with further information can be found at the manufacturer’s website  
383 ([http://info.somallogic.com/lp\\_campaign\\_somascan-white-paper\\_jan-2016](http://info.somallogic.com/lp_campaign_somascan-white-paper_jan-2016)). In brief, modified  
384 single-stranded DNA SOMAmers are used to bind to specific protein targets that are then  
385 quantified using a DNA microarray. Protein concentrations are quantified as relative  
386 fluorescent units.

387

388 Quality control (QC) was performed at the sample and SOMAmer level using control  
389 aptamers, as well as calibrator samples. At the sample level, hybridization controls on the  
390 microarray were used to correct for systematic variability in hybridization, while the median  
391 signal over all features assigned to one of three dilution sets (40%, 1% and 0.005%) was used  
392 to correct for within-run technical variability. The resulting hybridization scale factors and  
393 median scale factors were used to normalise data across samples within a run. The acceptance



394 criteria for these values are between 0.4 and 2.5 based on historical runs. SOMAmer-level  
395 QC made use of replicate calibrator samples using the same study matrix (plasma) to correct  
396 for between-run variability. The acceptance criteria for each SOMAmer is that the calibration  
397 scale factor be less than 0.4 from the median for each of the plates run. In addition, at the  
398 plate level, the acceptance criteria are that the median of the calibration scale factors is  
399 between 0.8 and 1.2, while 95% of individual SOMAmers must be less than 0.4 from the  
400 median within the plate.

401

402 In addition to QC processes routinely conducted by SomaLogic, we measured protein levels  
403 of 30 and 10 pooled plasma samples randomly distributed across plates for subcohort 1 and  
404 subcohort 2, respectively. This approach, which involved masking laboratory technicians to  
405 the presence of pooled samples, enabled estimation of the reproducibility of the protein  
406 assays in directly relevant samples. We calculated coefficients of variation (CVs) for each  
407 SOMAmer within each subcohort by dividing the standard deviation by the mean of the  
408 pooled plasma sample protein readouts. In addition to passing SomaLogic QC processes, we  
409 required SOMAmers to have a  $CV \leq 20\%$  in both subcohorts. Eight non-human protein  
410 targets were also excluded, leaving 3,283 SOMAmers (mapping to 2,994 unique  
411 proteins/protein complexes) for inclusion in the GWAS.

412

413 Protein mapping to UniProt identifiers and gene names was provided by SomaLogic.  
414 Mapping to Ensembl gene IDs and genomic positions was performed using Ensembl Variant  
415 Effects Predictor v83 (VEP)<sup>50</sup>. Protein subcellular locations were determined by exporting  
416 the subcellular location annotations from UniProt<sup>51</sup>. If the term “membrane” was included in  
417 the descriptor, the protein was considered to be a membrane protein, whereas if the term  
418 “secreted” (but not “membrane”) was included in the descriptor, the protein was considered

419 to be a secreted protein. Proteins not annotated as either membrane or secreted proteins were  
420 classified (by inference) as intracellular proteins. Proteins were mapped to molecular  
421 functions using gene ontology annotations<sup>52</sup> from UniProt.

422

### 423 **Non-genetic associations of proteins**

424 To validate the protein assays, we attempted to replicate the associations with age or sex of  
425 45 proteins previously reported by Ngo *et al* and 40 reported by Menni *et al*<sup>48,53</sup>. We used  
426 Bonferroni-corrected  $p$ -value thresholds of  $p=1.1 \times 10^{-3}$  (0.05/45) and  $p=1.2 \times 10^{-3}$  (0.05/40)  
427 respectively. Relative protein abundances were rank-inverse normalised within each  
428 subcohort and linear regression was performed using age, sex, BMI, natural log of estimated  
429 glomerular filtration rate (eGFR) and subcohort as independent variables.

430

### 431 **Genotyping and imputation**

432 The genotyping protocol and QC for the INTERVAL samples ( $n \sim 50,000$ ) have been  
433 described previously in detail<sup>14</sup>. Briefly, DNA extracted from buffy coat was used to assay  
434 approximately 830,000 variants on the Affymetrix Axiom UK Biobank genotyping array at  
435 Affymetrix (Santa Clara, California, US). Genotyping was performed in multiple batches of  
436 approximately 4,800 samples each. Sample QC was performed including exclusions for sex  
437 mismatches, low call rates, duplicate samples, extreme heterozygosity and non-European  
438 descent. An additional exclusion made for this study was of one participant from each pair of  
439 close (first- or second-degree) relatives, defined as  $\hat{\pi} > 0.187$ . Identity-by-descent was  
440 estimated using a subset of variants with call rate  $> 99\%$  and MAF  $> 5\%$  in the merged dataset  
441 of both subcohorts, pruned for linkage disequilibrium (LD) using PLINK v1.9<sup>54</sup>. Numbers of  
442 participants excluded at each stage of the genetic QC are summarized in Extended Data  
443 Figure 1. Multi-dimensional scaling was performed using PLINK v1.9 to create components

444 to account for ancestry in genetic analyses.

445

446 Prior to imputation, additional variant filtering steps were performed to establish a high  
447 quality imputation scaffold. In summary, 654,966 high quality variants (autosomal, non-  
448 monomorphic, bi-allelic variants with Hardy Weinberg Equilibrium (HWE)  $p > 5 \times 10^{-6}$ , with a  
449 call rate of  $> 99\%$  across the INTERVAL genotyping batches in which a variant passed QC,  
450 and a global call rate of  $> 75\%$  across all INTERVAL genotyping batches) were used for  
451 imputation. Variants were phased using SHAPEIT3 and imputed using a combined 1000  
452 Genomes Phase 3-UK10K reference panel. Imputation was performed via the Sanger  
453 Imputation Server (<https://imputation.sanger.ac.uk>) resulting in 87,696,888 imputed variants.

454

455 Prior to genetic association testing, variants were filtered in each subcohort separately using  
456 the following exclusion criteria: (1) imputation quality (INFO) score  $< 0.7$ , (2) minor allele  
457 count  $< 8$ , (3) HWE  $p < 5 \times 10^{-6}$ . In the small number of cases where imputed variants had the  
458 same genomic position (GRCh37) and alleles, the variant with the lowest INFO score was  
459 removed. 10,572,788 variants passing all filters in both subcohorts were taken forward for  
460 analysis ([Extended Data Figure 1](#)).

461

## 462 **Genome-wide association study**

463 Within each subcohort, relative protein abundances were first natural log-transformed. Log  
464 transformed protein levels were then adjusted in a linear regression for age, sex, duration  
465 between blood draw and processing (binary,  $\leq 1$  day/ $> 1$  day) and the first three principal  
466 components of ancestry from multi-dimensional scaling. The protein residuals from this  
467 linear regression were then rank-inverse normalized and used as phenotypes for association  
468 testing. Univariate linear regression using an additive genetic model was used to test genetic

469 associations. Association tests were carried out on allelic dosages to account for imputation  
470 uncertainty (“-method expected” option) using SNPTEST v2.5.2<sup>55</sup>.

471

## 472 **Meta-analysis and statistical significance**

473 Association results from the two subcohorts were combined via fixed-effects inverse-  
474 variance meta-analysis combining the betas and standard errors using METAL<sup>56</sup>. Genetic  
475 associations were considered to be genome-wide significant based on a conservative strategy  
476 requiring associations to have (i) a meta-analysis  $p$ -value  $< 1.5 \times 10^{-11}$  (genome-wide threshold  
477 of  $p = 5 \times 10^{-8}$  Bonferroni corrected for 3,283 aptamers tested), (ii) at least nominal significance  
478 ( $p < 0.05$ ) in both subcohorts, and also (iii) consistent direction of effect across subcohorts.  
479 We did not observe significant genomic inflation (mean inflation factor was 1.0, standard  
480 deviation = 0.01) ([Extended Data Figure 8](#)).

481

## 482 **Refinement of significant regions**

483 To identify distinct non-overlapping regions associated with a given SOMAmer, we first  
484 defined a 1Mb region around each significant variant for that SOMAmer. Starting with the  
485 region containing the variant with the smallest  $p$ -value, any overlapping regions were then  
486 merged and this process was repeated until no more overlapping 1Mb regions remained. The  
487 variant with the lowest  $p$ -value for each region was assigned as the “regional sentinel  
488 variant”. Due to the complexity of the Major Histocompatibility Region (MHC) region, we  
489 treated the extended MHC region (chr6:25.5-34.0Mb) as one region. To identify whether a  
490 region was associated with multiple SOMAMers, we used an LD-based clumping approach.  
491 Regional sentinel variants in high LD ( $r^2 \geq 0.8$ ) with each other were combined together into a  
492 single region.

493

## 494 **Conditional analyses**

495 To identify conditionally significant signals, we performed approximate genome-wide step-  
496 wise conditional analysis using GCTA v1.25.2<sup>57</sup> using the “cojo-slc” option. We used the  
497 same conservative significance threshold of  $p=1.5 \times 10^{-11}$  as for the univariate analysis. As  
498 inputs for GCTA, we used the summary statistics (i.e. betas and standard errors) from the  
499 meta-analysis. Correlation between variants was estimated using the hard-called genotypes  
500 (where a genotype was called if it had a posterior probability of  $>0.9$  following imputation or  
501 set to missing otherwise) in the merged genetic dataset, and only variants also passing the  
502 univariate genome-wide threshold ( $p < 1.5 \times 10^{-11}$ ) were considered for step-wise selection. As  
503 the conditional analyses use different data inputs (summarised rather than individual-level  
504 data), there were some cases where the conditional analysis failed to include sentinel variants  
505 that had borderline significant univariate associations in the step-wise selection. In these  
506 instances ( $n=28$ ), we re-conducted the joint model estimation without step-wise selection in  
507 GCTA with variants identified by the conditional analysis in addition to the regional sentinel  
508 variant. We report and highlight these cases in Supplementary Table 2.

509

## 510 **Replication of previous pQTLs**

511 We attempted to identify all previously reported pQTLs from GWAS and to assess whether  
512 they replicated in our study. We used the NCBI Entrez programming utility in R (rentrez) to  
513 perform a literature search for pQTL studies published from 2008 onwards. We searched for  
514 the following terms: “pQTL”, “pQTLs”, and “protein quantitative trait locus”. We  
515 supplemented this search by filtering out GWAS associations from the NHGRI-EBI GWAS  
516 Catalog v.1.0.1<sup>58</sup> (<https://www.ebi.ac.uk/gwas/>, downloaded April 2016), which has all  
517 phenotypes mapped to the Experimental Factor Ontology (EFO)<sup>59</sup>, by restricting to those  
518 with EFO annotations relevant to protein biomarkers (e.g. “protein measurement”,

519 EFO\_0004747). Studies identified through both approaches were manually filtered to include  
520 only studies that profiled plasma or serum samples and to exclude studies not assessing  
521 proteins. We recorded basic summary information for each study including the assay used,  
522 sample size and number of proteins with pQTLs (Supplementary Table 14). To reduce the  
523 impact of ethnic differences in allele frequencies on replication rate estimates, we filtered  
524 studies to include only associations reported in European-ancestry populations. We then  
525 manually extracted summary data on all reported associations from the manuscript or the  
526 supplementary material. This included rsID, protein UniProt ID, *p*-values, and whether the  
527 association is *cis/trans* (Supplementary Table 15).

528

529 To assess replication we first identified the set of unique UniProt IDs that were also assayed  
530 on the SOMAscan panel. For previous studies that used SomaLogic technology, we refined  
531 this match to the specific aptamer used. We then clumped associations into distinct loci using  
532 the same method applied to our pQTL (see **Refinement of significant regions**). For each  
533 locus, we asked if the sentinel SNP or a proxy ( $r^2 > 0.6$ ) was associated with the same  
534 protein/aptamer in our study at a defined significance threshold. For our primary assessment,  
535 we used a *p*-value threshold of  $10^{-4}$ . We also performed sensitivity analyses to explore factors  
536 that influence replication rate (Supplementary Note).

537

### 538 **Candidate gene annotation**

539 We defined a pQTL as *cis* when the most significantly associated variant in the region was  
540 located within 1Mb of the transcription start site (TSS) of the gene(s) encoding the protein.  
541 pQTLs lying outside of the region were defined as *trans*. When considering the distance of  
542 the top *cis*-associated variant from the relevant TSS, only proteins that map to single genes  
543 on the primary assembly in Ensembl v83 were considered.

544

545 For *trans* pQTLs, we sought to prioritise candidate genes in the region that might underpin  
546 the genotype-protein association. In addition to reporting the nearest gene to the sentinel  
547 variant, we employed “bottom up” and “top down” approaches, starting from the variant and  
548 protein respectively For the “bottom up” approach, the sentinel variant and corresponding  
549 proxies ( $r^2>0.8$ ) for each *trans* pQTL were first annotated using Ensembl VEP v83 (using the  
550 “pick” option) to determine whether variants were (1) protein-altering coding variants; (2)  
551 synonymous coding or 5’/3’ untranslated region (UTR); (3) intronic or up/downstream; or (4)  
552 intergenic. Second, we queried all sentinel variants and proxies against significant *cis* eQTL  
553 variants (defined by beta distribution-adjusted empirical *p*-values using a FDR threshold of  
554 0.05, see <http://www.gtexportal.org/home/documentationPage> for details) in any cell type or  
555 tissue from the Genotype-Tissue Expression (GTEx) project v6<sup>60</sup>  
556 (<http://www.gtexportal.org/home/datasets>). Third, we also queried promoter capture Hi-C  
557 data in 17 human primary hematopoietic cell types<sup>61</sup> to identify contacts (with a CHICAGO  
558 score >5 in at least one cell type) involving chromosomal regions containing a sentinel  
559 variant. We considered gene promoters annotated on either fragment (i.e., the fragment  
560 containing the sentinel variant or the other corresponding fragment) as potential candidate  
561 genes. Using these three sources of information, we generated a list of candidate genes for the  
562 *trans* pQTLs. A gene was considered a candidate if it fulfilled at least one of the following  
563 criteria: (1) it was proximal (intragenic or  $\pm 5$ Kb from the gene) or nearest to the sentinel  
564 variant; (2) it contained a sentinel or proxy variant ( $r^2>0.8$ ) that was protein-altering; (3) it  
565 had a significant *cis* eQTL in at least one GTEx tissue overlapping with a sentinel pQTL  
566 variant (or proxy); or (4) it was regulated by a promoter annotated on either fragment of a  
567 chromosomal contact<sup>61</sup> involving a sentinel variant.

568

569 For the “top down” approach, we first identified all genes with a TSS located within the  
570 corresponding pQTL region using the GenomicRanges Bioconductor package<sup>62</sup> with  
571 annotation from a GRCh37 GTF file from Ensembl  
572 ([ftp://ftp.ensembl.org/pub/grch37/update/gtf/homo\\_sapiens/](ftp://ftp.ensembl.org/pub/grch37/update/gtf/homo_sapiens/);  
573 “Homo\_sapiens.GRCh37.82.gtf.gz”, downloaded June 2016). We then identified any local  
574 genes that had previously been linked with the corresponding *trans*-associated protein(s)  
575 according to the following open source databases: (1) the Online Mendelian Inheritance in  
576 Man (OMIM) catalogue<sup>63</sup> (<http://www.omim.org/>); (2) the Kyoto Encyclopedia of Genes and  
577 Genomes (KEGG)<sup>64</sup> (<http://www.genome.jp/kegg/>); and (3) STRINGdb<sup>65</sup> (<http://string->  
578 [db.org/](http://stringdb.org/); v10.0). We accessed OMIM data via HumanMine web tool<sup>66</sup>  
579 (<http://www.humanmine.org/>; accessed June 2016), whereby we extracted all OMIM IDs for  
580 (i) our *trans*-affected proteins and (ii) genes local ( $\pm 500\text{Kb}$ ) to the corresponding *trans*-acting  
581 variant. We extracted all human KEGG pathway IDs using the KEGGREST Bioconductor  
582 package<sup>67</sup> (<https://bioconductor.org/packages/release/bioc/html/KEGGREST.html>). In cases  
583 where a *trans*-associated protein shared either an OMIM ID or a KEGG pathway ID with a  
584 gene local to the corresponding *trans*-acting variant, we took this as evidence of a potential  
585 functional involvement of that gene. We interrogated protein-protein interaction data by  
586 accessing STRINGdb data using the STRINGdb Bioconductor package<sup>68</sup>, whereby we  
587 extracted all pairwise interaction scores for each *trans*-affected protein and all proteins with  
588 genes local to the corresponding *trans*-acting variants. We took the default interaction score  
589 of 400 as evidence of an interaction between the proteins, therefore indicating a possible  
590 functional involvement for the local gene. In addition to using data from open source  
591 databases in our top-down approach we also adopted a “guilt-by-association” (GbA)  
592 approach utilising the same plasma proteomic data used to identify our pQTLs. We first  
593 generated a matrix containing all possible pairwise Pearson’s correlation coefficients between



594 our 3,283 SOMAmers. We then extracted the coefficients relating to our *trans*-associated  
595 proteins and any proteins encoded by genes local to their corresponding *trans*-acting variants  
596 (where available). Where the correlation coefficient was  $\geq 0.5$  we prioritised the relevant  
597 local genes as being potential mediators of the *trans*-signal(s) at that locus.

598

599 We report the potential candidate genes for our *trans* pQTLs from both the “bottom up” and  
600 “top down” approaches, highlighting cases where the same gene was highlighted by both  
601 approaches.

602

### 603 **Functional annotation of pQTLs**

604 Functional annotation of variants was performed using Ensembl VEP v83 using the “pick”  
605 option. We tested the enrichment of significant pQTL variants for certain functional classes  
606 by comparing to permuted sets of variants showing no significant association with any  
607 protein ( $p > 0.0001$  for all proteins tested). First the regional sentinel variants were LD-pruned  
608 at  $r^2$  of 0.1. Each time the sentinel variants were LD-pruned, one of the pair of correlated  
609 variants was removed at random and for each set of LD-pruned sentinel variants and 100 sets  
610 of equally sized null permuted variants were sampled matching for MAF (bins of 5%),  
611 distance to TSS (bins of 0-0.5Kb, 0.5Kb-2Kb, 2Kb-5Kb, 10Kb-20Kb, 20Kb-100Kb and  
612  $>100$ Kb in each direction) and LD ( $\pm$  half the number of variants in LD with the sentinel  
613 variant at  $r^2$  of 0.8). This procedure was repeated 100 times resulting in 10,000 permuted sets  
614 of variants. An empirical  $p$ -value was calculated as the proportion of permuted variant sets  
615 where the proportion that are classified as a particular functional group exceeded that of the  
616 test set of sentinel pQTL variants, and we used a significance threshold of  $p = 0.005$  (0.05/10  
617 functional classes tested).

618

## 619 **Evidence against aptamer-binding effects at *cis* pQTLs**

620 All protein assays that rely on binding (e.g. of antibodies or SOMAmers) are susceptible to  
621 the possibility of binding-affinity effects, where protein-altering variants (PAVs) (or their  
622 proxies in LD) are associated with protein measurements due to differential binding rather  
623 than differences in protein abundance. To account for this potential effect, we performed  
624 conditional analysis at all *cis* pQTLs where the sentinel variant was in LD ( $0.1 \leq r^2 \leq 0.9$ ) with  
625 a PAV in the gene(s) encoding the associated protein. First, variants were annotated with  
626 Ensembl VEP v83 using the “per-gene” option. Variant annotations were considered protein  
627 altering if they were annotated as coding sequence variant, frameshift variant, in-frame  
628 deletion, in-frame insertion, missense variant, protein altering variant, splice acceptor variant,  
629 splice donor variant, splice region variant, start lost, stop gained, or stop lost. To avoid multi-  
630 collinearity, PAVs were LD-pruned ( $r^2 > 0.9$ ) using PLINK v1.9 before including them as  
631 covariates in the conditional analysis on the meta-analysis summary statistics using GCTA  
632 v1.25.2. Any variants with an  $r^2 \geq 0.9$  with any of the PAVs were removed. Coverage of  
633 known common (MAF > 5%) PAVs in our data was checked by comparison with exome  
634 sequences from ~60,000 individuals in the Exome Aggregation Consortium<sup>69</sup> (ExAC  
635 [<http://exac.broadinstitute.org>], downloaded June 2016).

636

## 637 **Testing for regulatory and functional enrichment**

638 We tested whether our pQTLs were enriched for functional and regulatory characteristics  
639 using GARFIELD v1.2.0<sup>18</sup>. GARFIELD is a non-parametric permutation-based enrichment  
640 method that compares input variants to permuted sets matched for number of proxies ( $r^2 \geq$   
641 0.8), MAF and distance to the closest TSS. It first applies “greedy pruning” ( $r^2 < 0.1$ ) within a  
642 1Mb region of the most significant variant. GARFIELD annotates variants with more than a  
643 thousand features, drawn predominantly from the GENCODE, ENCODE and ROADMAP

644 projects, which includes genic annotations, histone modifications, chromatin states and other  
645 regulatory features across a wide range of tissues and cell types.

646

647 The enrichment analysis was run using all variants that passed our Bonferroni-adjusted  
648 significance threshold ( $p < 1.5 \times 10^{-11}$ ) for association with any protein. For each of the  
649 matching criteria (MAF, distance to TSS, number of LD proxies), we used five bins. In total  
650 we tested 25 combinations of features (classified as transcription factor binding sites, FAIRE-  
651 seq, chromatin states, histone modifications, footprints, hotspots, or peaks) with up to 190  
652 cell types from 57 tissues, leading to 998 tests. Hence, we considered enrichment with a  $p < 5$   
653  $\times 10^{-5}$  (0.05/998) to be statistically significant.

654

## 655 **Disease annotation**

656 To identify diseases that our pQTLs have been associated with, we queried our sentinel  
657 variants and their strong proxies ( $r^2 \geq 0.8$ ) against publicly available disease GWAS data using  
658 PhenoScanner<sup>8</sup>. A list of datasets queried is available at  
659 <http://www.phenoscaner.medschl.cam.ac.uk/information.html>. For disease GWAS, results  
660 were filtered to  $p < 5 \times 10^{-8}$  and then manually curated to retain only the entry with the strongest  
661 evidence for association (i.e. smallest  $p$ -value) per disease. Non-disease phenotypes such as  
662 anthropometric traits, intermediate biomarkers and lipids were excluded manually.

663

## 664 ***Cis* eQTL overlap and enrichment of *cis* pQTLs for *cis* eQTLs**

665 Each regional sentinel *cis* variant its strong proxies ( $r^2 \geq 0.8$ ) were queried against publicly  
666 available eQTL association data using PhenoScanner. *Cis* eQTL results were filtered to retain  
667 only variants with  $p < 1.5 \times 10^{-11}$ . Only *cis* eQTLs for the same gene as the *cis* pQTL protein  
668 were retained. To assess whether our *cis* pQTLs were more likely to also be *cis* eQTLs than

669 non-pQTL variants, we used data from the GTEx project v6, due to the availability of  
670 genome-wide association results across a wide range of tissues and cell-types. GTEx results  
671 were filtered to contain only variants lying in *cis* (i.e., within 1Mb) of genes that encode  
672 proteins analysed in our study and only variants in both datasets were utilised.

673

674 For the enrichment analysis, the *cis* pQTL sentinel variants were first LD-pruned ( $r^2 < 0.1$ )  
675 and the proportion of sentinel *cis* pQTL variants that are also eQTLs (at  $p < 1.5 \times 10^{-11}$ ) for the  
676 same protein/gene was compared to a permuted set of variants that were not pQTLs  
677 ( $p > 0.0001$  for all proteins). We generated 10,000 permuted sets of null variants matched for  
678 MAF, distance to TSS and LD (as described for functional annotation enrichment in  
679 **Functional annotation of pQTLs**). An empirical *p*-value was calculated as the proportion of  
680 permuted variant sets where the proportion that are also *cis* eQTLs exceeded that of the test  
681 set of sentinel *cis* pQTL variants. Results were similar in sensitivity analyses using the  
682 standard genome-wide significance threshold of  $p < 5 \times 10^{-8}$  for the eQTLs (13.0% for whole  
683 blood, 18.7% for LCLs, 17.1% for liver and 13.4% for monocytes) as well as also using only  
684 the sentinel variants at *cis* pQTLs that were robust to adjusting for PAVs, suggesting our  
685 results are robust to choice of threshold and potential differential binding effects.

686

### 687 **Mediation of the GDF11/8 *trans* pQTL by WFIKKN2 levels**

688 To assess whether the *trans* pQTL for GDF11/8 in the *WFIKKN2* gene region was mediated  
689 by WFIKKN2 levels, we first regressed the rank inverse transformed residuals for GDF11/8  
690 used for the GWAS against the WFIKKN2 residuals, adjusting for subcohort. The residuals  
691 from this regression were subsequently regressed against allelic dosages for each variant in  
692 the *WFIKKN2* region. As there were two SOMAmers targeting WFIKKN2, we tested both to  
693 see if similar results were obtained. Regional association plots were made using Gviz<sup>70</sup>.

694

## 695 **Selection of genetic instruments for Mendelian randomization**

696 In Mendelian randomization (MR), genetic variants are used as “instrumental variables” (IV)  
697 for assessing the causal effect of the exposure (here a plasma protein) on the outcome (here  
698 disease).

699

## 700 **Proteins in the *IL1RL1-IL18R1* locus and atopic dermatitis**

701 To identify the likely causal proteins that underpin the previous genetic association of the  
702 *IL1RL1-IL18R1* locus (chr11:102.5-103.5Mb) with atopic dermatitis (AD)<sup>36</sup>, we used a  
703 multivariable MR approach. For each protein encoded by a gene in the *IL1RL1-IL18R1* locus,  
704 we took genetic variants that had a *cis* association at  $p < 1 \times 10^{-4}$  and ‘LD-pruned’ them at  
705  $r^2 < 0.1$ . We then used these variants as instrumental variables for their respective proteins in  
706 univariate MR. For multivariable MR, association estimates for all proteins in the locus were  
707 extracted for all instruments. We used PhenoScanner to obtain association statistics for the  
708 selected variants in the European-ancestry population of a recent large-scale GWAS meta-  
709 analysis<sup>36</sup>. Where the relevant variant was not available, the strongest proxy with  $r^2 \geq 0.8$  was  
710 used.

711

## 712 **MMP-12 and coronary heart disease (CHD)**

713 To test whether plasma MMP-12 levels have a causal effect on risk of CHD, we selected  
714 genetic variants in the *MMP12* gene region to use as instrumental variables. We constructed a  
715 genetic score comprising 17 variants that had a *cis* association with MMP-12 levels at  
716  $p < 5 \times 10^{-8}$  and that were not highly correlated with one another ( $r^2 < 0.2$ ). To perform  
717 multivariable MR, we used association estimates for these variants with other MMP proteins  
718 in the locus (MMP-1, MMP-7, MMP-8, MMP-10, MMP-13). Summary associations for

719 variants in the score with CHD were obtained through PhenoScanner from a recent large-  
720 scale 1000 Genomes-based GWAS meta-analysis which consists mostly (77%) of individuals  
721 of European ancestry<sup>71</sup>.

722

## 723 **MR analysis**

724 Two-sample univariate MR was performed for each protein separately using summary  
725 statistics in the inverse-variance weighted method adapted to account for correlated  
726 variants<sup>72,73</sup>. For each of  $G$  genetic variants ( $g = 1, \dots, G$ ) having per-allele estimate of the  
727 association with the protein  $\beta_{Xg}$  and standard error  $\sigma_{Xg}$ , and per-allele estimate of the  
728 association with the outcome (here, AD or CHD)  $\beta_{Yg}$  and standard error  $\sigma_{Yg}$ , the IV estimate  
729 ( $\hat{\theta}_{XY}$ ) is obtained from generalised weighted linear regression of the genetic associations with  
730 the outcome ( $\beta_Y$ ) on the genetic associations with the protein ( $\beta_X$ ) weighting for the  
731 precisions of the genetic associations with the outcome and accounting for correlations  
732 between the variants according to the regression model:

733

$$734 \quad \beta_Y = \theta_{XY} \beta_X + \varepsilon, \quad \varepsilon \sim N(0, \Omega)$$

735

736 where  $\beta_Y$  and  $\beta_X$  are vectors of the univariable (marginal) genetic associations, and the  
737 weighting matrix  $\Omega$  has terms  $\Omega_{g_1g_2} = \sigma_{Yg_1} \sigma_{Yg_2} \rho_{g_1g_2}$ , and  $\rho_{g_1g_2}$  is the correlation between  
738 the  $g_1$ th and  $g_2$ th variants.

739

740 The IV estimate from this method is:

741

$$742 \quad \hat{\theta}_{XY} = (\beta_X^T \Omega^{-1} \beta_X)^{-1} \beta_X^T \Omega^{-1} \beta_Y$$

743

744 and the standard error is:

745

746 
$$\text{se}(\hat{\theta}_{XY}) = \sqrt{(\beta_X^T \Omega^{-1} \beta_X)^{-1}}$$

747

748 where  $^T$  is a matrix transpose. This is the estimate and standard error from the regression  
749 model fixing the residual standard error to 1 (equivalent to a fixed-effects model in a meta-  
750 analysis).

751

752 Genetic variants in univariate MR need to satisfy three key assumptions to be valid  
753 instruments:

754 (1) the variant is associated with the risk factor of interest (i.e., the protein level),

755 (2) the variant is not associated with any confounder of the risk factor-outcome  
756 association,

757 (3) the variant is conditionally independent of the outcome given the risk factor and  
758 confounders.

759

760 To account for potential effects of functional pleiotropy<sup>74</sup>, we performed multivariable MR  
761 using the weighted regression-based method proposed by Burgess *et al*<sup>75</sup>. For each of  $K$  risk  
762 factors in the model ( $k = 1, \dots, K$ ), the weighted regression-based method is performed by  
763 multivariable generalized weighted linear regression of the association estimates  $\beta_Y$  on each  
764 of the association estimates with each risk factor  $\beta_{Xk}$  in a single regression model:

765

766 
$$\beta_Y = \theta_{XY1} \beta_{X1} + \theta_{XY2} \beta_{X2} + \dots + \theta_{XYK} \beta_{XK} + \varepsilon, \quad \varepsilon \sim N(0, \Omega)$$

767

768 where  $\beta_{x_1}$  is the vectors of the univariable genetic associations with risk factor 1, and so on.  
769 This regression model is implemented by first pre-multiplying the association vectors by the  
770 Cholesky decomposition of the weighting matrix, and then applying standard linear  
771 regression to the transformed vectors. Estimates and standard errors are obtained fixing the  
772 residual standard error to be 1 as above.

773

774 The multivariable MR analysis allows the estimation of the causal effect of a protein on  
775 disease outcome accounting for the fact that genetic variants may be associated with multiple  
776 proteins in the region. Causal estimates from multivariable MR represent direct causal  
777 effects, representing the effect of intervening on one risk factor in the model while keeping  
778 others constant.

779

#### 780 **MMP-12 genetic score sensitivity analyses**

781 We performed two sensitivity analyses to determine the robustness of the Mendelian  
782 randomization findings. First, we measured plasma MMP-12 levels using a different method  
783 (proximity extension assay; Olink Bioscience, Uppsala, Sweden<sup>76,77</sup>) in a sub-sample of 141  
784 individuals, and used this to derive genotype-MMP12 effect estimates for the 17 variants in  
785 our genetic score. Second, we obtained effect estimates from a pQTL study based on  
786 SOMAscan assay measurements in an independent sample of ~1,000 individuals<sup>7</sup>. In both  
787 cases the genetic score reflecting higher plasma MMP-12 was associated with lower risk of  
788 CHD.

789

#### 790 **Overlap of pQTLs with drug targets**

791 We used the Informa Pharmaprojects database from Citeline to obtain information on drugs  
792 that target proteins assayed on the SOMAscan platform. This is a manually curated database



793 that maintains profiles for >60,000 drugs. For our analysis, we focused on the following  
794 information for each drug: protein target, indications, and development status. We included  
795 drugs across the development pipeline, including those in pre-clinical studies or with no  
796 development reported, drugs in clinical trials (all phases), and launched/registered drugs. For  
797 each protein assayed, we identified all drugs in the Informa Pharmaprojects with a matching  
798 protein target based on UniProt ID. When multiple drugs targeted the same protein, we  
799 selected the drug with the latest stage of development.

800

801 For drug targets with significant pQTLs, we identified the subset where the sentinel variant or  
802 proxy variants in LD ( $r^2 > 0.6$ ) are also associated with disease risk through PhenoScanner.  
803 We used an internal Merck auto-encoding method to map GWAS traits and drug indications  
804 to a common set of terms from the Medical Dictionary for Regulatory Activities (MedDRA).  
805 MedDRA terms are organized into a hierarchy with five levels. We mapped each GWAS trait  
806 and indication onto the ‘Lowest Level Terms’ (i.e. the most specific terms available). All  
807 matching terms were recorded for each trait or indication. We matched GWAS traits to drug  
808 indications based on the highest level of the hierarchy, called ‘System Organ Class’ (SOC).  
809 We designated a protein as ‘matching’ if at least one GWAS trait term matched with at least  
810 one indication term for at least one drug.

811

## 812 **Data availability**

813 Summary association results will be made available on publication through

814 <http://www.phenoscaner.medschl.cam.ac.uk>.

## 815 References

- 816 1. Albert, F. W. & Kruglyak, L. The role of regulatory variation in complex traits and  
817 disease. *Nat. Rev. Genet.* **16**, 197–212 (2015).
- 818 2. Liu, Y. *et al.* Quantitative variability of 342 plasma proteins in a human twin  
819 population. *Mol. Syst. Biol.* **11**, 786 (2015).
- 820 3. Melzer, D. *et al.* A Genome-Wide Association Study Identifies Protein Quantitative  
821 Trait Loci (pQTLs). *PLoS Genet* **4**, e1000072 (2008).
- 822 4. Enroth, S., Johansson, Å., Enroth, S. B. & Gyllensten, U. Strong effects of genetic and  
823 lifestyle factors on biomarker variation and use of personalized cutoffs. *Nat Commun*  
824 **5**, (2014).
- 825 5. Deming, Y. *et al.* Genetic studies of plasma analytes identify novel potential  
826 biomarkers for several complex traits. *Sci. Rep.* **6**, 18092 (2016).
- 827 6. Rohloff, J. C. *et al.* Nucleic Acid Ligands With Protein-like Side Chains: Modified  
828 Aptamers and Their Use as Diagnostic and Therapeutic Agents. *Mol. Ther. - Nucleic*  
829 *Acids* **3**, e201 (2014).
- 830 7. Suhre, K. *et al.* Connecting genetic risk to disease end points through the human blood  
831 plasma proteome. *Nat. Commun.* **8**, 14357 (2017).
- 832 8. Staley, J. R. *et al.* PhenoScanner: a database of human genotype-phenotype  
833 associations. *Bioinformatics* **32**, 3207–3209 (2016).
- 834 9. Burgess, S. *et al.* Using published data in Mendelian randomization: a blueprint for  
835 efficient identification of causal risk factors. *Eur. J. Epidemiol.* **30**, 543–52 (2015).
- 836 10. Stranger, B. E. *et al.* Patterns of cis regulatory variation in diverse human populations.  
837 *PLoS Genet.* **8**, e1002639 (2012).
- 838 11. Montgomery, S. B. & Dermitzakis, E. T. From expression QTLs to personalized  
839 transcriptomics. *Nat. Rev. Genet.* **12**, 277–282 (2011).
- 840 12. Battle, A. *et al.* Characterizing the genetic basis of transcriptome diversity through  
841 RNA-sequencing of 922 individuals. *Genome Res.* **24**, 14–24 (2014).
- 842 13. Walter, K. *et al.* The UK10K project identifies rare variants in health and disease.  
843 *Nature* **526**, 82–90 (2015).
- 844 14. Astle, W. J. *et al.* The Allelic Landscape of Human Blood Cell Trait Variation and  
845 Links to Common Complex Disease. *Cell* **167**, 1415–1429.e19 (2016).
- 846 15. Harrow, J. *et al.* GENCODE: the reference human genome annotation for The  
847 ENCODE Project. *Genome Res.* **22**, 1760–74 (2012).
- 848 16. Dunham, I. *et al.* An integrated encyclopedia of DNA elements in the human genome.  
849 *Nature* **489**, 57–74 (2012).
- 850 17. Bernstein, B. E. *et al.* The NIH Roadmap Epigenomics Mapping Consortium. *Nat.*  
851 *Biotechnol.* **28**, 1045–8 (2010).
- 852 18. Iotchkova, V. *et al.* GARFIELD - GWAS Analysis of Regulatory or Functional  
853 Information Enrichment with LD correction. *bioRxiv* (2016). at  
854 <http://biorxiv.org/content/early/2016/11/07/085738.abstract>
- 855 19. Wu, L. *et al.* Variation and genetic control of protein abundance in humans. *Nature*  
856 **499**, 79–82 (2013).
- 857 20. Westra, H.-J. *et al.* Systematic identification of trans eQTLs as putative drivers of  
858 known disease associations. *Nat Genet* **45**, 1238–1243 (2013).
- 859 21. Lappalainen, T. *et al.* Transcriptome and genome sequencing uncovers functional  
860 variation in humans. *Nature* **501**, 506–511 (2013).
- 861 22. Schadt, E. E. *et al.* Mapping the Genetic Architecture of Gene Expression in Human  
862 Liver. *PLoS Biol.* **6**, e107 (2008).

- 863 23. Zeller, T. *et al.* Genetics and Beyond – The Transcriptome of Human Monocytes and  
864 Disease Susceptibility. *PLoS One* **5**, e10693 (2010).
- 865 24. Nai, A. *et al.* TMPRSS6 rs855791 modulates hepcidin transcription in vitro and serum  
866 hepcidin levels in normal individuals. *Blood* **118**, (2011).
- 867 25. Carrasquillo, M. M. *et al.* Genome-wide Screen Identifies rs646776 near Sortilin as a  
868 Regulator of Progranulin Levels in Human Plasma. *Am. J. Hum. Genet.* **87**, 890–897  
869 (2010).
- 870 26. Schuelke, M. *et al.* Myostatin Mutation Associated with Gross Muscle Hypertrophy in  
871 a Child. *N. Engl. J. Med.* **350**, 2682–2688 (2004).
- 872 27. Malik, V., Rodino-Klapac, L. R. & Mendell, J. R. Emerging drugs for Duchenne  
873 muscular dystrophy. *Expert Opin. Emerg. Drugs* **17**, 261–277 (2012).
- 874 28. Kondás, K., Szláma, G., Trexler, M. & Patthy, L. Both WFIKKN1 and WFIKKN2  
875 have high affinity for growth and differentiation factors 8 and 11. *J. Biol. Chem.* **283**,  
876 23677–84 (2008).
- 877 29. Jostins, L. *et al.* Host–microbe interactions have shaped the genetic architecture of  
878 inflammatory bowel disease. *Nature* **491**, 119–124 (2012).
- 879 30. Liu, J. Z. *et al.* Association analyses identify 38 susceptibility loci for inflammatory  
880 bowel disease and highlight shared genetic risk across populations. *Nat. Genet.* **47**,  
881 979–986 (2015).
- 882 31. Di Narzo, A. F. *et al.* High-Throughput Characterization of Blood Serum Proteomics  
883 of IBD Patients with Respect to Aging and Genetic Factors. *PLOS Genet.* **13**,  
884 e1006565 (2017).
- 885 32. Lyons, P. A. *et al.* Genetically Distinct Subsets within ANCA-Associated Vasculitis.  
886 *N. Engl. J. Med.* **367**, 214–223 (2012).
- 887 33. Hingorani, A. & Humphries, S. Nature’s randomised trials. *Lancet* **366**, 1906–8  
888 (2005).
- 889 34. Grönberg, H. *et al.* Prostate cancer screening in men aged 50–69 years (STHLM3): a  
890 prospective population-based diagnostic study. *Lancet Oncol.* **16**, 1667–1676 (2015).
- 891 35. Eeles, R. A. *et al.* Multiple newly identified loci associated with prostate cancer  
892 susceptibility. *Nat. Genet.* **40**, 316–321 (2008).
- 893 36. Paternoster, L. *et al.* Multi-ancestry genome-wide association study of 21,000 cases  
894 and 95,000 controls identifies new risk loci for atopic dermatitis. *Nat. Genet.* **47**,  
895 1449–56 (2015).
- 896 37. Ganz, P. *et al.* Development and Validation of a Protein-Based Risk Score for  
897 Cardiovascular Outcomes Among Patients With Stable Coronary Heart Disease. *JAMA*  
898 **315**, 2532 (2016).
- 899 38. Goncalves, I. *et al.* Elevated Plasma Levels of MMP-12 Are Associated With  
900 Atherosclerotic Burden and Symptomatic Cardiovascular Disease in Subjects With  
901 Type 2 DiabetesSignificance. *Arterioscler. Thromb. Vasc. Biol.* **35**, 1723–1731 (2015).
- 902 39. Traylor, M. *et al.* A Novel MMP12 Locus Is Associated with Large Artery  
903 Atherosclerotic Stroke Using a Genome-Wide Age-at-Onset Informed Approach.  
904 *PLoS Genet.* **10**, e1004469 (2014).
- 905 40. Pinto, A. R., Godwin, J. W. & Rosenthal, N. A. Macrophages in cardiac homeostasis,  
906 injury responses and progenitor cell mobilisation. *Stem Cell Res.* **13**, 705–714 (2014).
- 907 41. Nelson, M. R. *et al.* The support of human genetic evidence for approved drug  
908 indications. *Nat. Genet.* **47**, 856–860 (2015).
- 909 42. Albagha, O. M. E. *et al.* Genome-wide association study identifies variants at CSF1,  
910 OPTN and TNFRSF11A as genetic risk factors for Paget’s disease of bone. *Nat.*  
911 *Genet.* **42**, 520–524 (2010).
- 912 43. Schwarz, P., Rasmussen, A. Q., Kvist, T. M., Andersen, U. B. & Jørgensen, N. R.

- 913 Paget's disease of the bone after treatment with Denosumab: a case report. *Bone* **50**,  
914 1023–5 (2012).
- 915 44. Polyzos, S. A. *et al.* Denosumab Treatment for Juvenile Paget's Disease: Results From  
916 Two Adult Patients With Osteoprotegerin Deficiency ('Balkan' Mutation in the  
917 TNFRSF11B Gene). *J. Clin. Endocrinol. Metab.* **99**, 703–707 (2014).
- 918 45. Gieger, C. *et al.* New gene functions in megakaryopoiesis and platelet formation.  
919 *Nature* **480**, 201–208 (2011).
- 920 46. Moore, C. *et al.* The INTERVAL trial to determine whether intervals between blood  
921 donations can be safely and acceptably decreased to optimise blood supply: study  
922 protocol for a randomised controlled trial. *Trials* **15**, 363 (2014).
- 923 47. Gold, L. *et al.* Aptamer-Based Multiplexed Proteomic Technology for Biomarker  
924 Discovery. *PLoS One* **5**, e15004 (2010).
- 925 48. Menni, C. *et al.* Circulating Proteomic Signatures of Chronological Age. *J Gerontol A*  
926 *Biol Sci Med Sci* (2014). doi:10.1093/gerona/glu121
- 927 49. Sattlecker, M. *et al.* Alzheimer's disease biomarker discovery using SOMAscan  
928 multiplexed protein technology. *Alzheimer's Dement.* **10**, 724–734 (2014).
- 929 50. McLaren, W. *et al.* Deriving the consequences of genomic variants with the Ensembl  
930 API and SNP Effect Predictor. *Bioinformatics* **26**, 2069–70 (2010).
- 931 51. UniProt Consortium. UniProt: a hub for protein information. *Nucleic Acids Res.* **43**,  
932 D204–D212 (2015).
- 933 52. Ashburner, M. *et al.* Gene Ontology: tool for the unification of biology. *Nat. Genet.*  
934 **25**, 25–29 (2000).
- 935 53. Ngo, D. *et al.* Aptamer-Based Proteomic Profiling Reveals Novel Candidate  
936 Biomarkers and Pathways in Cardiovascular Disease. *Circulation* **134**, (2016).
- 937 54. Chang, C. C. *et al.* Second-generation PLINK: rising to the challenge of larger and  
938 richer datasets. *Gigascience* **4**, 7 (2015).
- 939 55. Marchini, J., Howie, B., Myers, S., McVean, G. & Donnelly, P. A new multipoint  
940 method for genome-wide association studies by imputation of genotypes. *Nat. Genet.*  
941 **39**, 906–913 (2007).
- 942 56. Willer, C. J., Li, Y. & Abecasis, G. R. METAL: fast and efficient meta-analysis of  
943 genomewide association scans. *Bioinformatics* **26**, 2190–1 (2010).
- 944 57. Yang, J. *et al.* Conditional and joint multiple-SNP analysis of GWAS summary  
945 statistics identifies additional variants influencing complex traits. *Nat. Genet.* **44**, 369–  
946 75, S1-3 (2012).
- 947 58. Welter, D. *et al.* The NHGRI GWAS Catalog, a curated resource of SNP-trait  
948 associations. *Nucleic Acids Res.* **42**, D1001-6 (2014).
- 949 59. Malone, J. *et al.* Modeling sample variables with an Experimental Factor Ontology.  
950 *Bioinformatics* **26**, 1112–1118 (2010).
- 951 60. Aguet, F. *et al.* Local genetic effects on gene expression across 44 human tissues.  
952 *bioRxiv* (2016). at <http://biorxiv.org/content/early/2016/09/09/074450.abstract>
- 953 61. Javierre, B. M. *et al.* Lineage-Specific Genome Architecture Links Enhancers and  
954 Non-coding Disease Variants to Target Gene Promoters. *Cell* **167**, 1369–1384.e19  
955 (2016).
- 956 62. Lawrence, M. *et al.* Software for Computing and Annotating Genomic Ranges. *PLoS*  
957 *Comput. Biol.* **9**, e1003118 (2013).
- 958 63. Amberger, J. S., Bocchini, C. A., Schiettecatte, F., Scott, A. F. & Hamosh, A.  
959 OMIM.org: Online Mendelian Inheritance in Man (OMIM(R)), an online catalog of  
960 human genes and genetic disorders. *Nucleic Acids Res.* **43**, D789–D798 (2015).
- 961 64. Kanehisa, M., Sato, Y., Kawashima, M., Furumichi, M. & Tanabe, M. KEGG as a  
962 reference resource for gene and protein annotation. *Nucleic Acids Res.* **44**, D457–D462

- 963 (2016).
- 964 65. Szklarczyk, D. *et al.* STRING v10: protein-protein interaction networks, integrated  
965 over the tree of life. *Nucleic Acids Res.* **43**, D447–D452 (2015).
- 966 66. Smith, R. N. *et al.* InterMine: a flexible data warehouse system for the integration and  
967 analysis of heterogeneous biological data. *Bioinformatics* **28**, 3163–3165 (2012).
- 968 67. Tenenbaum, D. KEGGREST: Client-side REST access to KEGG. (2016).
- 969 68. Franceschini, A. *et al.* STRING v9.1: protein-protein interaction networks, with  
970 increased coverage and integration. *Nucleic Acids Res.* **41**, D808–D815 (2013).
- 971 69. Lek, M. *et al.* Analysis of protein-coding genetic variation in 60,706 humans. *Nature*  
972 **536**, 285–291 (2016).
- 973 70. Hahne, F. & Ivanek, R. in *Methods in molecular biology (Clifton, N.J.)* **1418**, 335–351  
974 (2016).
- 975 71. Nikpay, M. *et al.* A comprehensive 1,000 Genomes-based genome-wide association  
976 meta-analysis of coronary artery disease. *Nat. Genet.* **47**, 1121–30 (2015).
- 977 72. Burgess, S., Butterworth, A. & Thompson, S. G. Mendelian randomization analysis  
978 with multiple genetic variants using summarized data. *Genet. Epidemiol.* **37**, 658–665  
979 (2013).
- 980 73. Burgess, S., Dudbridge, F. & Thompson, S. G. Combining information on multiple  
981 instrumental variables in Mendelian randomization: comparison of allele score and  
982 summarized data methods. *Stat. Med.* **35**, 1880–906 (2016).
- 983 74. Burgess, S. & Thompson, S. G. Multivariable Mendelian randomization: the use of  
984 pleiotropic genetic variants to estimate causal effects. *Am. J. Epidemiol.* **181**, 251–60  
985 (2015).
- 986 75. Burgess, S., Dudbridge, F. & Thompson, S. G. Re: ‘Multivariable Mendelian  
987 randomization: the use of pleiotropic genetic variants to estimate causal effects’. *Am.*  
988 *J. Epidemiol.* **181**, 290–1 (2015).
- 989 76. Lundberg, M., Eriksson, A., Tran, B., Assarsson, E. & Fredriksson, S. Homogeneous  
990 antibody-based proximity extension assays provide sensitive and specific detection of  
991 low-abundant proteins in human blood. *Nucleic Acids Res.* **39**, e102–e102 (2011).
- 992 77. Assarsson, E. *et al.* Homogenous 96-plex PEA immunoassay exhibiting high  
993 sensitivity, specificity, and excellent scalability. *PLoS One* **9**, e95192 (2014).
- 994



## 995 **Supplementary Information**

996 Supplementary Information is available in the online version of the paper.

## 997 **Acknowledgements**

998 We acknowledge the participation of all INTERVAL volunteers. We thank the INTERVAL  
999 study co-ordination teams (at the Universities of Cambridge and Oxford and at NHS Blood  
1000 and Transplant [NHSBT]), including the blood donation staff at the 25 static centers, for their  
1001 help with INTERVAL participant recruitment and study fieldwork, as well as the Cambridge  
1002 BioResource and NHSBT staff for their help with volunteer recruitment. We thank the  
1003 INTERVAL Operations Team headed by Dr Richard Houghton and Dr Carmel Moore, and  
1004 the INTERVAL Data Management Team headed by Dr Matthew Walker. We thank all the  
1005 staff at SomaLogic for processing and running the proteomic assays. We thank Aaron Day-  
1006 Williams, Joshua McElwee, Dorothee Diogo, William Astle, Emanuele Di Angelantonio,  
1007 Ewan Birney, Arianne Richard, Justin Mason and Michael Inouye for helpful comments on  
1008 the manuscript and Mark Sharp for help mapping drug indications to GWAS traits. The  
1009 MRC/BHF Cardiovascular Epidemiology Unit is supported by the UK Medical Research  
1010 Council (G0800270), British Heart Foundation (SP/09/002), UK National Institute for Health  
1011 Research Cambridge Biomedical Research Centre, European Research Council (268834), and  
1012 European Commission Framework Programme 7 (HEALTH-F2-2012-279233). B.B.S. is  
1013 funded by the Cambridge School of Clinical Medicine MRC/Sackler Prize PhD Studentship  
1014 (MR/K50127X/1) and supported by the Cambridge School of Clinical Medicine MB-PhD  
1015 programme. J.E.P. is funded by a British Heart Foundation Clinical Research Fellowship  
1016 through the BHF Cambridge Centre of Excellence [RE/13/6/30180]. D.S.P. and D.S. are  
1017 funded by the Wellcome Trust (105602/Z/14/Z). N.S. is supported by the Wellcome Trust  
1018 (WT098051 and WT091310), the EU FP7 (EPIGENESYS 257082 and BLUEPRINT  
1019 HEALTH-F5-2011-282510). J.A.T is supported by the supported by the Wellcome Trust

1020 (091157) and JDRF (9-2011-253). K.S. is funded by the Biomedical Research Program funds  
1021 at Weill Cornell Medicine in Qatar, a program funded by the Qatar Foundation. J.D. is a  
1022 British Heart Foundation Professor, European Research Council Senior Investigator, and  
1023 National Institute for Health Research (NIHR) Senior Investigator. The INTERVAL study is  
1024 funded by NHSBT (11-01-GEN) and has been supported by the NIHR-BTRU in Donor  
1025 Health and Genomics (NIHR BTRU-2014-10024) at the University of Cambridge in  
1026 partnership with NHSBT. The views expressed are those of the authors and not necessarily  
1027 those of the NHS, the NIHR, the Department of Health of England, or NHSBT.

## 1028 **Author Contributions**

1029 Conceptualization and experimental design: J.D., A.S.B., B.B.S., H.R., R.M.P.;  
1030 Methodology: B.B.S., A.B.S., J.C.M., J.E.P., H.R., S.B.; Analysis: B.B.S., J.C.M., J.E.P.,  
1031 D.S., J.B., J.R.S., T.J., E.P., P.S., C.O-W., M.A.K., S.K.W., A.C., N.B., S.L.S.; Contributed  
1032 reagents, materials, protocols or analysis tools: N.J., S.K.W., E.S.Z., J.B., M.A.K., J.R.S.,  
1033 B.P.P.; Supervision: A.S.B., H.R., C.S.F., J.D., R.M.P., D.S.P., A.M.W.; Writing - principal:  
1034 B.B.S., A.S.B., J.E.P., J.C.M., H.R., J.D.; Writing – review and editing: B.B.S., A.S.B.,  
1035 J.E.P., J.C.M., J.D., H.R., K.S., A.M.W., N.J., D.J.R., J.A.T., D.S.P., N.S., C.S.F., R.M.P.;  
1036 Creation of the INTERVAL BioResource: J.R.B., D.J.R., W.H.O., N.W.M., J.D.; Funding  
1037 acquisition: N.W.M., J.R.B., D.J.R., W.H.O., C.S.F., R.M.P., J.D.; all authors critically  
1038 reviewed the manuscript.

## 1039 **Author Information**

1040 Reprints and permissions information is available at [www.nature.com/reprints](http://www.nature.com/reprints). The authors  
1041 declare the following competing financial interests: J.C.M., A.C., C.S.F., R.M.P., H.R. are  
1042 employees at MRL, Merck & Co., Inc. S.K.W., E.S.Z., N.J. are employees and stakeholders  
1043 in SomaLogic, Inc. The other authors have nothing to disclose. Correspondence and requests

1044 for materials should be addressed to A.S.B. ([asb38@medschl.cam.ac.uk](mailto:asb38@medschl.cam.ac.uk)) and J.D.

1045 ([jd292@medschl.cam.ac.uk](mailto:jd292@medschl.cam.ac.uk)).

1046



## 1047 **Figures**

### 1048 **Figure 1. The genetic architecture of plasma protein levels.**

1049 (a) Genomic location of pQTLs. Plot of sentinel variants for pQTLs (red= *cis*, blue= *trans*).  
1050 Y-axis indicates the position of the gene that encodes the associated protein. The twelve most  
1051 associated regions of the genome are annotated. (b) Plot of the statistical significance of the  
1052 most associated (sentinel) *cis* variant for each protein against the distance from the  
1053 transcription start site (TSS). (c) Histogram of the number of significantly associated loci per  
1054 protein. (d) Histogram of the number of conditionally significant signals within each  
1055 associated locus. (e) Histogram of protein variance explained (adjusted  $R^2$ ) by conditionally  
1056 significant variants. (f) Distribution of effect size against minor allele frequency (MAF) for  
1057 *cis* and *trans* pQTLs. (g) Distribution of the predicted consequences of the sentinel pQTL  
1058 variants compared to matched permuted null sets of variants. Asterisks highlight empirical  
1059 enrichment  $p < 0.005$ .

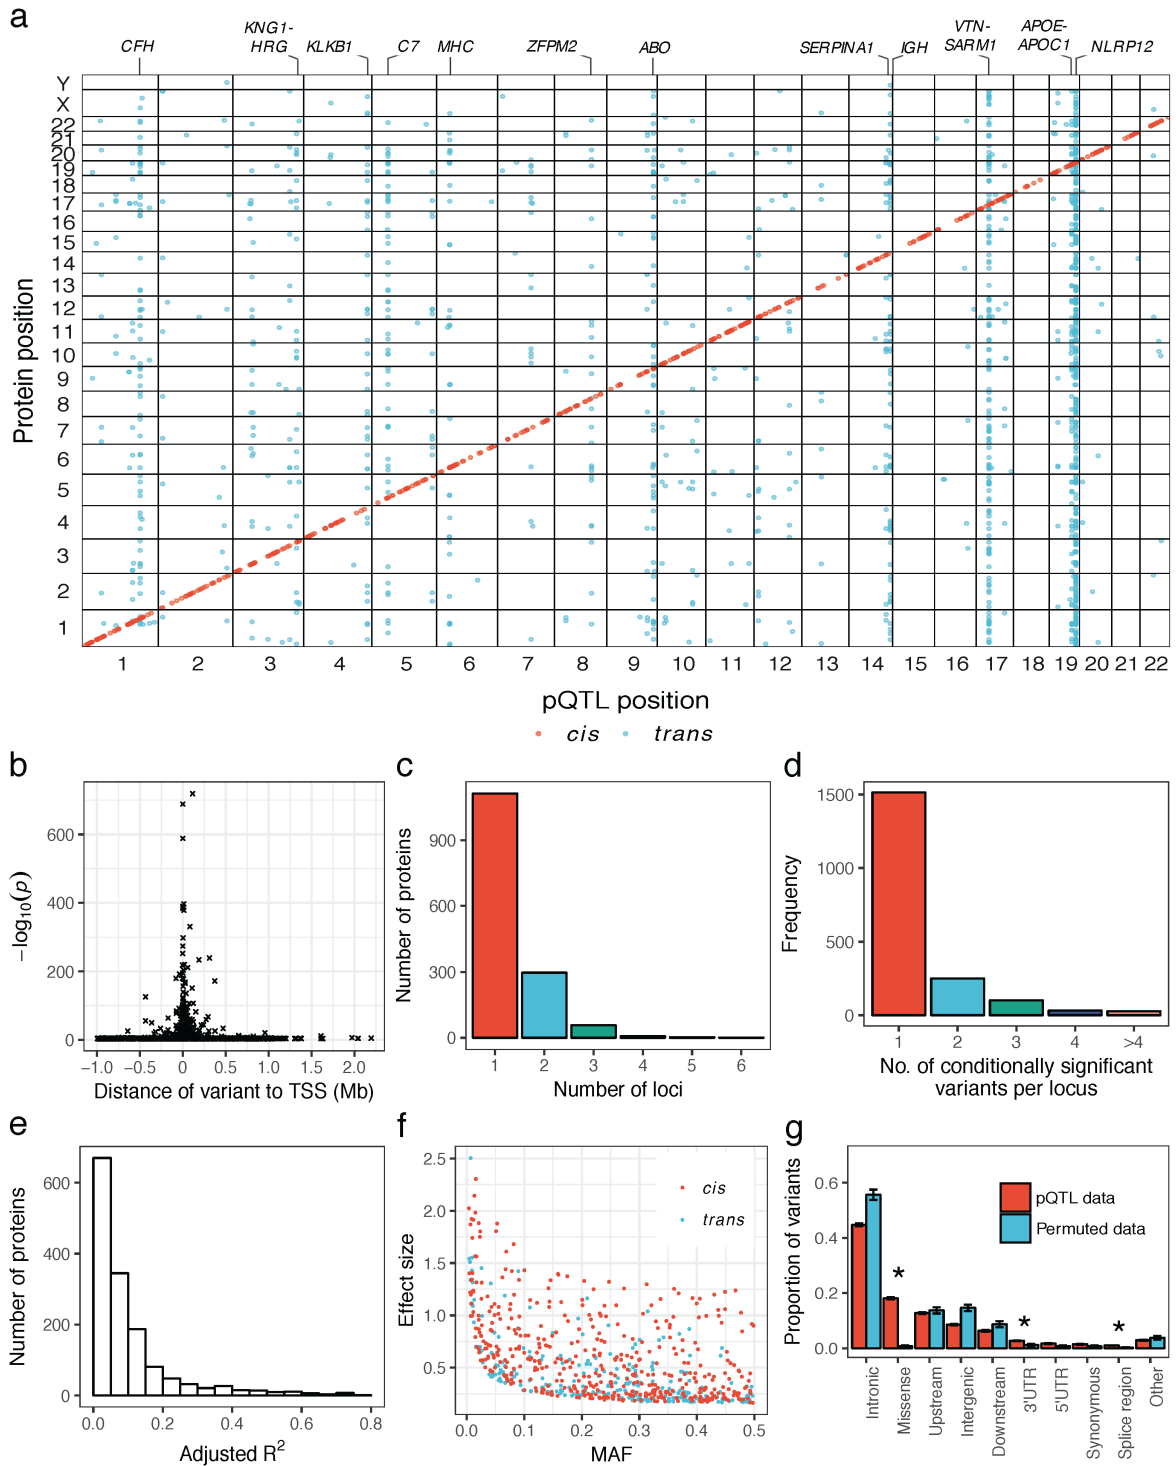

1060  
1061

1062 **Figure 2. The GDF11/8 *trans* pQTL is mediated by genetic control of WFIKKN2 levels.**

1063 (a) Regional association plots of the *trans* pQTL (sentinel variant rs11079936) for GDF11/8  
1064 before and after adjusting for levels of WFIKKN2 (upper panels), and the WFIKKN2 *cis*  
1065 pQTL after adjusting for GDF11/8 levels (bottom panel). A similar pattern of association for  
1066 WFIKKN2 was seen prior to GDF11/8 adjustment (not shown). (b) Proposed mechanism of  
1067 how the *trans* pQTL for GDF11/8 is mediated by WFIKKN2 levels.

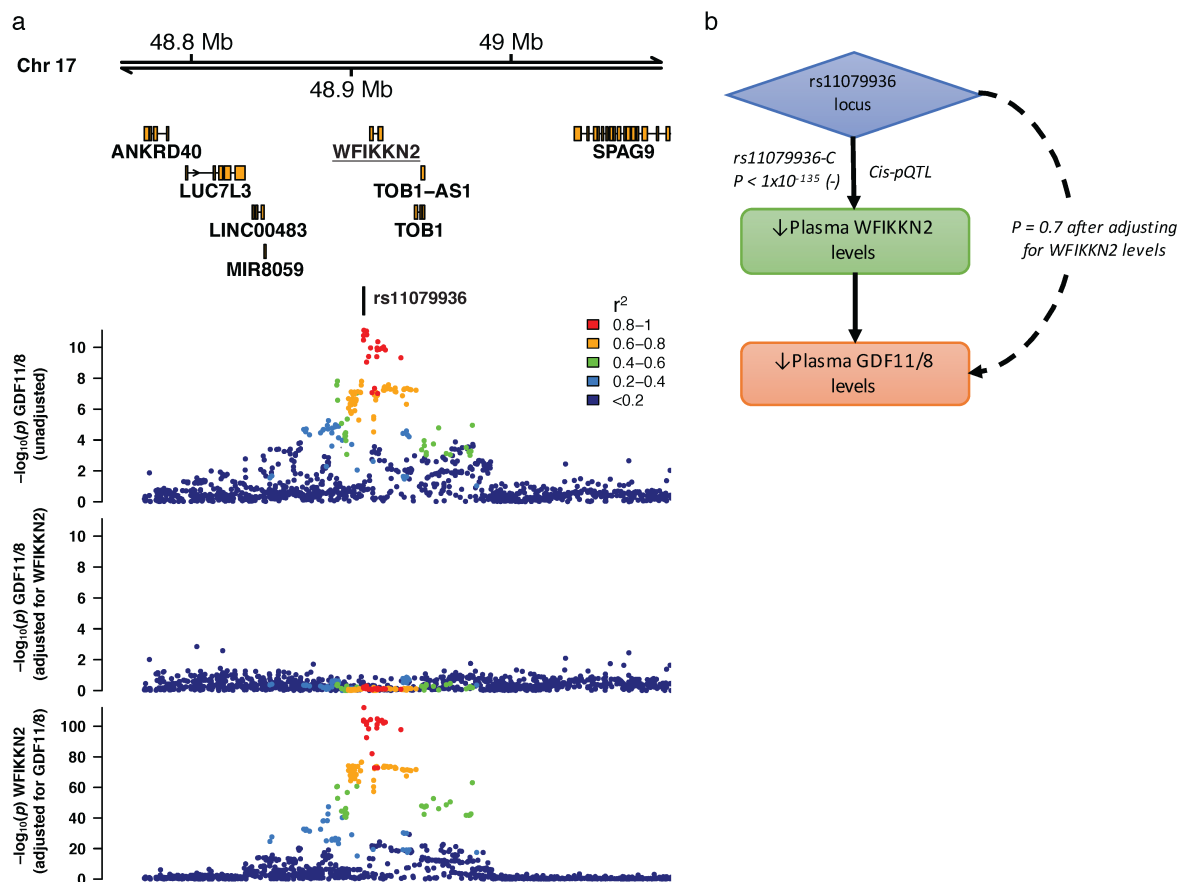

1068

1069

1070 **Figure 3. *Trans* pQTL for BLIMP1 at an inflammatory bowel disease (IBD) associated**  
 1071 **genetic variant in *MST1*.**

1072 (a) Missense variant rs3197999 in the *MST1* region on chromosome 3 is associated with IBD  
 1073 (top) and BLIMP1 levels (bottom). (b) Regional association plot of the IBD susceptibility  
 1074 locus on chromosome 6 adjacent to the *PRDM1* gene, which encodes BLIMP1. IBD  
 1075 association data are for European participants from Liu *et al.*, 2015. (c) Boxplot for relative  
 1076 plasma BLIMP1 levels by rs3197999 genotype, stratified by the two subcohorts used in our  
 1077 analysis.

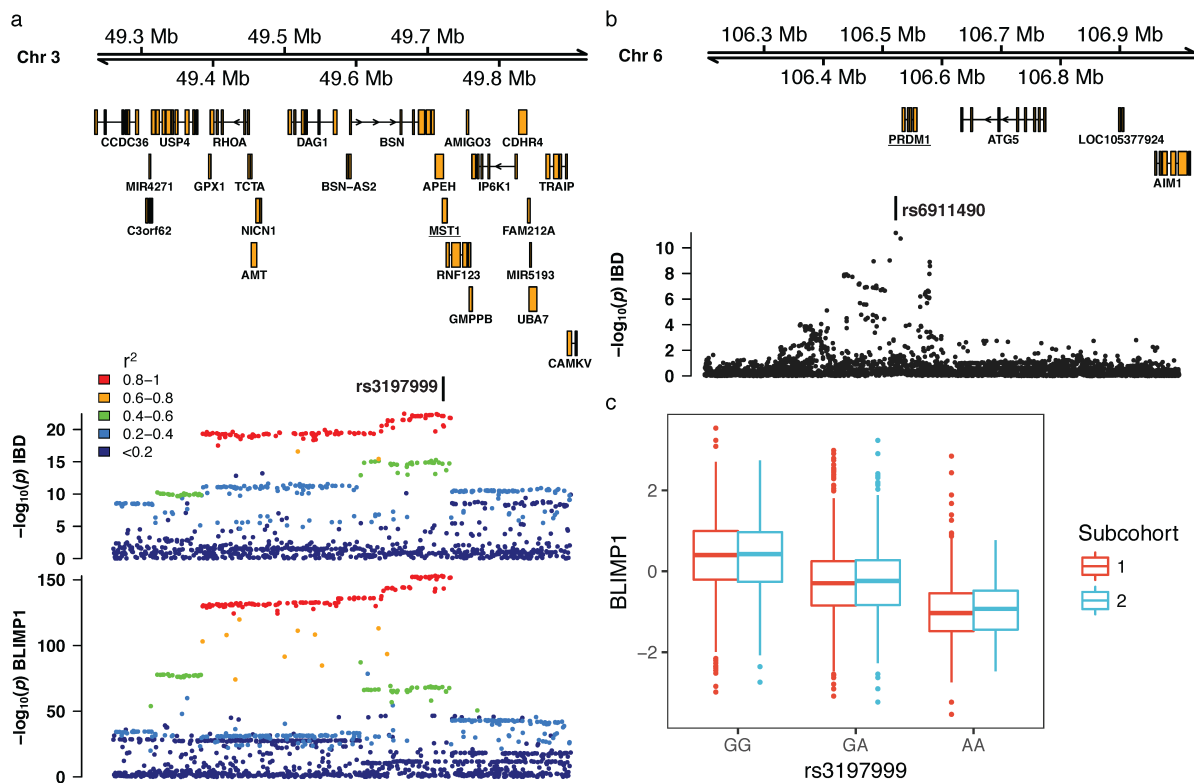

1078  
 1079

1080 **Figure 4. Missense variant rs28929474 in *SERPINA1* is a *trans* pQTL hotspot.**

1081 Numbers (outermost) indicate chromosomes. Interconnecting lines link the genomic location  
1082 of rs28929474 and the genes encoding significantly associated ( $p < 1.5 \times 10^{-11}$ ) proteins. Line  
1083 thickness is proportional to the effect size of the associations with red positive and blue  
1084 negative.

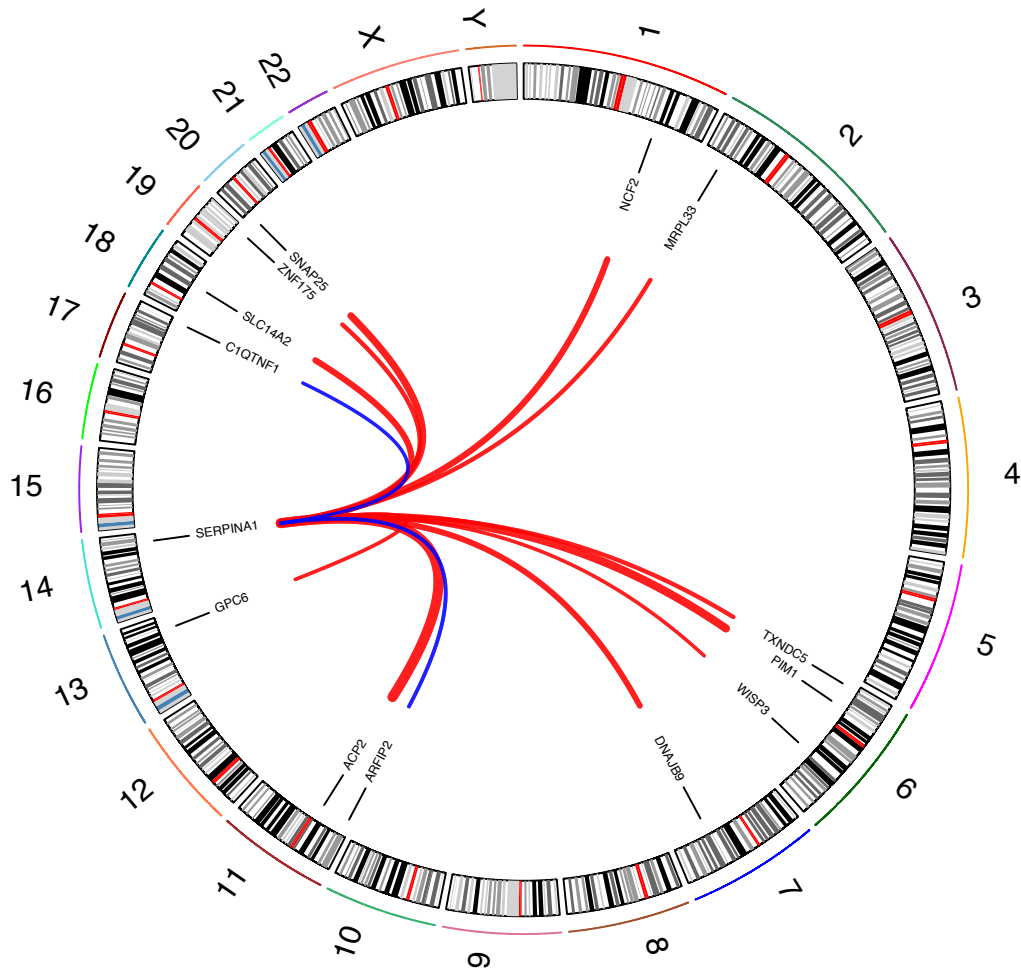

1085  
1086  
1087

1088 **Figure 5. Evaluation of causal role of proteins in disease.**

1089 Forest plot of univariate and multivariable Mendelian randomization (MR) estimates. (a)

1090 Proteins in the *IL1RL1-IL18R1* locus and risk of atopic dermatitis (AD). No univariate MR

1091 estimates available for IL1R1 and IL18RAP due to no significant pQTLs to select as a

1092 “genetic instrument”. (b) MMP-12 levels and risk of coronary heart disease (CHD).

1093

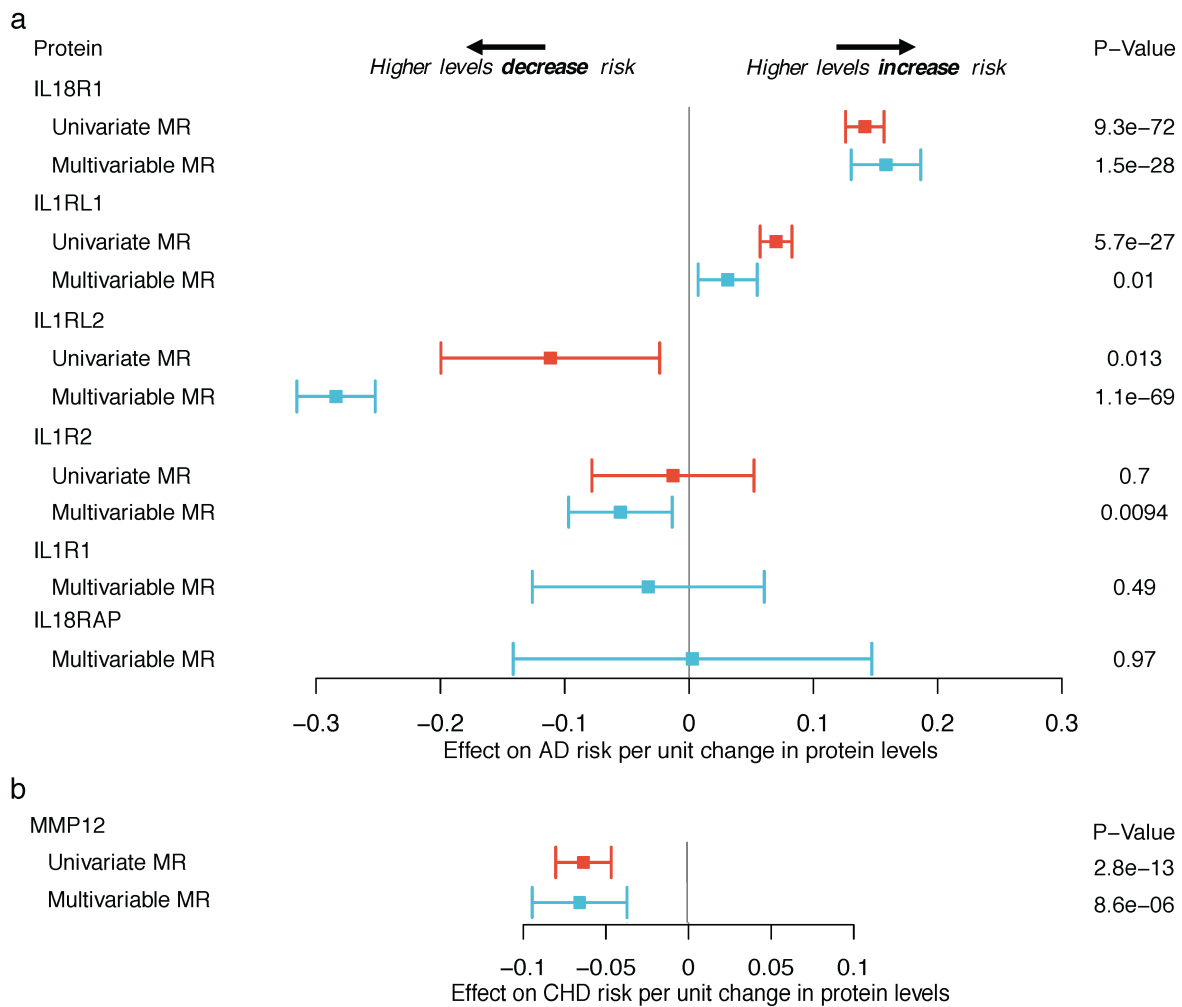

1094
